# 1 Unexpected post-glacial colonisation route explains 2 the white colour of barn owls (*Tyto alba*) from the 3 British Isles

4 **Short title:** Unexpected history of white British barn owls

5

6 Ana Paula Machado<sup>1\*</sup>, Tristan Cumer<sup>1</sup>, Christian Iseli<sup>2</sup>, Emmanuel Beaudoin<sup>3</sup>, Anne-Lyse  
7 Ducrest<sup>1</sup>, Melanie Dupasquier<sup>3</sup>, Nicolas Guex<sup>2</sup>, Klaus Dichmann<sup>4</sup>, Rui Lourenço<sup>5</sup>, John Lusby<sup>6</sup>,  
8 Hans-Dieter Martens<sup>7</sup>, Laure Prévost<sup>8</sup>, David Ramsden<sup>9</sup>, Alexandre Roulin<sup>1†</sup>, Jérôme Goudet<sup>1,10†</sup>

9

10 \* corresponding author

11 † co-senior authors

12

13 Contact details for corresponding author: Department of Ecology and Evolution, Biophore  
14 Building, University of Lausanne, CH-1015 Lausanne, Switzerland. Tel: +41 21 692 42 18. Fax:  
15 +41 21 692 41 65. Email: [anapaula.machado@unil.ch](mailto:anapaula.machado@unil.ch)

16

17 <sup>1</sup>Department of Ecology and Evolution, University of Lausanne, Lausanne, Switzerland

18 <sup>2</sup>Bioinformatics Competence Centre, University of Lausanne, Lausanne, Switzerland

19 <sup>3</sup>Lausanne Genomic Technologies Facility, Lausanne, Switzerland

20 <sup>4</sup>Hyldehegnet 27, 6400 Sønderborg, Denmark

- 21 <sup>5</sup>Mediterranean Institute for Agriculture, Environment and Development, Laboratory of  
22 Ornithology, IIFA, University of Évora, Évora, Portugal
- 23 <sup>6</sup>BirdWatch Ireland, Kilcoole, Co. Wicklow, Ireland
- 24 <sup>7</sup>Gettorfer Weg 13, 24214 Neuwittenbek, Germany
- 25 <sup>8</sup>Association CHENE, Centre d'Hébergement et d'Etude sur la Nature et l'Environnement, 76190  
26 Allouville-Bellefosse, France
- 27 <sup>9</sup>Barn Owl Trust, Devon, United Kingdom
- 28 <sup>10</sup>Swiss Institute of Bioinformatics, Lausanne, Switzerland

## 29 Abstract

30 The climate fluctuations of the Quaternary shaped the movement of species in and out of glacial  
31 refugia. In Europe, the majority of species followed one of the described traditional postglacial  
32 recolonization routes from the southern peninsulas towards the north. Like most organisms, barn  
33 owls are assumed to have colonized the British Isles by crossing over Doggerland, a land bridge  
34 that connected Britain to northern Europe. However, while they are dark rufous in northern  
35 Europe, barn owls in the British Isles are conspicuously white, a contrast that could suggest  
36 selective forces are at play on the islands. However, analysis of known candidate genes involved  
37 in colouration found no signature of selection. Instead, using whole genome sequences and  
38 species distribution modelling, we found that owls colonised the British Isles soon after the last  
39 glaciation, directly from a white coloured refugium in the Iberian Peninsula, before colonising  
40 northern Europe. They would have followed a yet unknown post-glacial colonization route to the  
41 Isles over a westwards path of suitable habitat in now submerged land in the Bay of Biscay, thus  
42 not crossing Doggerland. As such, they inherited the white colour of their Iberian founders and  
43 maintained it through low gene flow with the mainland that prevents the import of rufous alleles.  
44 Thus, we contend that neutral processes likely explain this contrasting white colour compared to  
45 continental owls. With the barn owl being a top predator, we expect future research will show this  
46 unanticipated route was used by other species from its paleo community.

47 **Key words** – Demographic inference; MC1R; Plumage colouration; Reference genome; Species  
48 distribution modelling; Whole-genome resequencing.

49

## 50 Introduction

51 The dramatic climate fluctuations of the Quaternary were key in shaping the global distribution of  
52 species and communities observed today (Ficetola, Mazel, & Thuiller, 2017; Hewitt, 2000).  
53 During the last glaciation, northern Europe was largely covered by ice caps, and the resulting  
54 lower sea levels unveiled an expanded coastline widely different from that of today. The  
55 inhospitable conditions throughout the continent forced many temperate species into warmer  
56 refugia, most commonly the southern peninsulas of Iberia, Italy and Balkans (Hewitt, 1999,  
57 2011). Once temperatures started increasing about 18 thousand years BP, ice sheets melted, the  
58 sea rose and these species re-expanded northwards into central and northern Europe, a key step  
59 in determining their modern distribution and genetic structure across the continent. Early  
60 comparative phylogeography studies described differences in the route and timing of colonisation  
61 from each refuge population and identified the main post-glacial recolonization patterns from the  
62 south (Hewitt, 1999, 2000; Taberlet, Fumagalli, Wust-Saucy, & Cosson, 1998). However,  
63 advances in sequencing technology and the consequent increase in studies with high  
64 representation molecular markers have since provided numerous examples of alternative routes  
65 and cryptic refugia for different taxa in mainland Europe as well as on islands (Bilton et al., 1998;  
66 Deffontaine et al., 2005; García-Vázquez, Pinto Llona, & Grandal-d'Anglade, 2019; Herman et al.,  
67 2017; Stewart & Lister, 2001).

68 The colonisation of the British Isles by terrestrial organisms has often been described in the  
69 context of the main phylogeographic patterns, with mainland north-western Europe as its origin  
70 (Hewitt, 1999, 2000; Montgomery, Provan, McCabe, & Yalden, 2014). Such a route would have  
71 been facilitated by Doggerland, a large land bridge of alluvial plains that connected Great Britain  
72 (GB) to mainland northern Europe before submerging under the north Sea 8'000 years BP  
73 (Coles, 1998; Ward, Larcombe, & Lillie, 2006). Most terrestrial vertebrates of GB do appear to  
74 have arrived via Doggerland, as evidenced by the similarity between its mammal fauna and that  
75 of northern rather than southern Europe (Montgomery et al., 2014). Nonetheless, some species  
76 believed to have followed this path were found to have had glacial refugia on the islands

77 themselves (Stewart & Lister, 2001), including plants (Kelly, Charman, & Newnham, 2010),  
78 amphibians (Snell, Tetteh, & Evans, 2005; Teacher, Garner, & Nichols, 2009) and mammals  
79 (Boston, Ian Montgomery, Hynes, & Prodöhl, 2015; Lister, 1984). Some taxa revealed other  
80 surprising post-glacial patterns such as colonization of the British Isles from multiple refugia in  
81 independent waves (badger: O'meara et al. 2012; water vole: Brace et al. 2016) and even  
82 separate colonisation of Ireland and GB (stoat: Martínková et al. 2007).

83 Barn owls (*Tyto alba*) recolonised western Europe following the last glaciation from a refugium in  
84 the Iberian Peninsula (Antoniazza et al., 2014; Burri et al., 2016). On the mainland, barn owl  
85 ventral plumage colouration follows a latitudinal cline ranging from mostly white in the southern  
86 populations to dark rufous in the north (Antoniazza, Burri, Fumagalli, Goudet, & Roulin, 2010;  
87 Antoniazza et al., 2014). Despite their post-glacial expansion route, the clinal variation in colour  
88 was not a neutral by-product of range expansion, but was rather created and maintained by an  
89 independent post-glacial selective process (Antoniazza et al., 2014). The genetic basis of this  
90 pheomelanin-based trait is not fully understood, but a specific non-synonymous variant (V126I) in  
91 the melanocortin-1 receptor (*MC1R*) gene has been found to explain roughly 30% of its variation  
92 in Europe (San-Jose et al., 2015). The derived *MC1R* rufous allele produces the darkest owl  
93 phenotypes and follows the European colour cline of increasing frequency with latitude (Burri et  
94 al., 2016).

95 It is hypothesised that, given their aversion to crossing large water bodies, barn owls recolonized  
96 Great Britain following the traditional route by crossing over Doggerland (Martin, 2017). However,  
97 barn owls from the British Isles are famously white (Martin, 2017; Roulin & Randin, 2016) in  
98 stark contrast to their darker mainland counterparts at similar latitudes. Over-land expansion  
99 from a north-western European population, inhabited mostly by rufous owls with 10% - 45%  
100 rufous *MC1R* allele, would be at odds with the whiteness of the GB population. This disparity is  
101 especially startling, given that rufous individuals disperse further than white ones (Roulin, 2013;  
102 van den Brink, Dreiss, & Roulin, 2012), and would thus be more likely to colonise the islands in  
103 the first place. Finally, with GB being a recently isolated island, its avifauna is very similar to that

104 of continental Europe (albeit less species rich), and examples of such phenotypic divergence from  
105 the mainland are rare; the barn owl is thus an intriguing exception. Being sensitive to extreme  
106 cold (Altwegg, Roulin, Kestenholz, & Jenni, 2006), a northern refugium seems unlikely. However,  
107 such phenotypic disparity suggests that, unless strong selective pressure is involved, the  
108 colonisation timing and route of barn owls of the British Isles might have been less  
109 straightforward than has been assumed.

110 Here, we address the post-glacial colonisation history of barn owls in the British Isles in light of  
111 the puzzling whiteness of their plumage. First, with a new broad sampling of 147 individuals from  
112 western Europe, we confirm that owls from the British Isles do not fit into the expected  
113 colouration and *MC1R* pattern of the mainland, with darker individuals at higher latitudes. Taking  
114 advantage of a highly contiguous newly-assembled reference genome and using the whole-  
115 genome sequences of 61 individuals, we use the neutral genetic structure to model the  
116 demographic history of barn owl colonisation of the northern part of Europe and the British Isles  
117 from a glacial refugium in Iberia. Then, we use ringing data to support estimations of current gene  
118 flow. Lastly, we investigate the potential role of other colour-linked genes in maintaining the  
119 phenotypic disparity in plumage colour between the British Isles and mainland Europe.

120

121

## 122 **Materials & Methods**

### 123 **Tissue sampling, *MC1R* genotyping and colour measurement**

124 In total, 147 individual barn owls were sampled for this study from six European populations (Sup.  
125 Table 1): Ireland (IR), Great Britain (GB), France (FR), Switzerland (CH), Denmark (DK) and  
126 Portugal (PT). A denser sampling was performed in the British Isles (n=113) as this was the first  
127 time these populations were studied, while for the mainland populations data was already  
128 available (Burri et al., 2016). Genomic DNA was extracted from blood, feathers or soft tissue

129 using the DNeasy Blood & Tissue kit (Qiagen, Hilden, Germany) following the manufacturer's  
130 instructions, including RNA digestion with RNase A. A previously established allelic discrimination  
131 assay (San-Jose et al., 2015) was used to molecularly determine individual genotypes at the  
132 amino acid position 126 of the Melanocortin 1 receptor (*MC1R*) gene of the 147 individuals (Sup.  
133 Table 1). Additional allelic frequencies at this locus published in Burri et al. (2016) from the  
134 mainland populations of interest to this study were used for context (N=247 individuals; Appendix  
135 1).

136 For all individuals with available breast feathers ( $n=145$ ), pheomelanin-based colour was  
137 estimated as the brown chroma of the reflectance spectra (for detailed description see  
138 Antoniazza et al. 2010). Briefly, the brown chroma represents the ratio of the red part of the  
139 spectrum (600–700 nm) to the complete visible spectrum (300–700 nm). The reflectance of four  
140 points of the top of three overlapping breast feathers was measured using a S2000  
141 spectrophotometer (Ocean Optics, Dunedin, FL) and a dual deuterium and halogen 2000 light  
142 source (Mikropack, Mikropack, Ostfildern, Germany). An individual's brown chroma score was  
143 obtained as the average of these four points. Brown chroma data from Burri et al. (2016) were  
144 used to complete the dataset, using the same individuals as for the *MC1R* analysis (Appendix 1).  
145 Given the marked non-normality of the data, a non-parametric Kruskal-Wallis test was performed  
146 to detect differences in coloration between the six populations. Further, a Pairwise Wilcoxon Rank  
147 Sum test was used to identify significant differences between pairs of populations using a  
148 Bonferroni correction.

149

## 150 **New reference genome**

151 As the available reference genome for the European *Tyto alba* was fragmented (Ducrest et al.,  
152 2020), a new reference was produced in order to achieve a near chromosome-level assembly. A  
153 full description of the process and its detailed results are given in Appendix 2. Briefly, a long-read  
154 PacBio library was produced from a blood sample of a Swiss individual at an expected coverage  
155 of 100x for the barn owl's 1.3Gb genome. FALCON and FALCON-Unzip v.3 (Chin et al., 2016) were

156 used to assemble PacBio reads. Then, a high molecular weight DNA Bionano optical mapping  
157 library was used to assemble PacBio contigs into scaffolds. Finally, repeated regions were  
158 identified using RepeatModeler v.1.0.11 (Smit & Hubley, 2008-2015) and masked with  
159 RepeatMasker v.4.0.7 (Smit, Hubley, & Green, 2013-2015). Coding regions were identified using  
160 the Braker2 pipeline v.2.0.1 (Brůna, Hoff, Lomsadze, Stanke, & Borodovsky, 2020; Hoff, Lange,  
161 Lomsadze, Borodovsky, & Stanke, 2016; Hoff, Lomsadze, Borodovsky, & Stanke, 2019; Stanke,  
162 Diekhans, Baertsch, & Haussler, 2008; Stanke, Schöffmann, Morgenstern, & Waack, 2006).

163

#### 164 **Whole-genome resequencing and SNP calling**

165 For the population genomics analyses of this study, the whole genomes of 61 out of the 147  
166 individual barn owls were sequenced (Sup. Table 1). In addition, one eastern (*T. javanica* from  
167 Singapore) and one American barn owl (*T. furcata* from California, USA) were used as outgroups.  
168 See Supplementary Methods for a complete description of the library preparation, sequencing,  
169 SNP calling and filtering. Briefly, individual 100bp TruSeq DNA PCR-free libraries (Illumina) were  
170 sequenced with Illumina HiSeq 2500 high-throughput paired-end sequencing technology at the  
171 Lausanne Genomic Technologies Facility (GTF, University of Lausanne, Switzerland). The  
172 bioinformatics pipeline used to obtain analysis-ready SNPs was adapted from the Genome  
173 Analysis Toolkit (GATK) Best Practices (Van der Auwera et al., 2013) to a non-model organism  
174 following the developers' recommendations, producing a full dataset of 6'721'999 SNP for the  
175 61 European individuals with an average coverage of 21.1x (3.36 SD).

176

#### 177 **Population structure and genetic diversity**

178 To investigate population structure among our samples, sNMF v.1.2 (Frichot, Mathieu, Trouillon,  
179 Bouchard, & François, 2014) was run for K 2 to 6 in 25 replicates to infer individual clustering  
180 and admixture proportions. For this analysis, singletons were excluded and the remaining SNPs  
181 were pruned for linkage disequilibrium (LD) with PLINK v1.946 (Purcell et al., 2007; parameters -



182 indep-pairwise 50 10 0.1) as recommended by the authors, yielding 319'801 SNP. The same  
183 dataset was used to perform a Principal Component Analysis (PCA) with the R package SNPRelate  
184 (Zheng et al., 2012). Treemix (Pickrell & Pritchard, 2012) was used to infer population splits in  
185 our data, using the LD-pruned dataset further filtered to include no missing data (180'764 SNP).  
186 To detect meaningful admixture between populations, 10 replicates were run for 0 to 8 migration  
187 events, with the tree rooted on the PT population, representative of the glacial refugium. An extra  
188 run without migration events was conducted with a north-American owl as an outgroup in the  
189 dataset to verify that the root did not affect the topology of the tree.

190 To estimate population statistics, individuals found to be mis-assigned to their given population  
191 based on genetic structure analyses (PCA and sNMF) were removed so as not to bias allelic  
192 frequencies (N=3 individuals from Ireland). Individual expected and observed heterozygosity and  
193 population-specific private alleles were estimated using custom R scripts for each genetic lineage  
194 identified by sNMF with K=4. To account for differences in sample sizes, private alleles were  
195 calculated by randomly sampling 9 individuals from the larger populations (GB and central  
196 Europe) 10 times in a bootstrap-fashion and estimating the mean. Individual-based relatedness  
197 ( $\beta$ ; Weir and Goudet 2017), inbreeding coefficient for SNP data, overall and population pairwise  
198  $F_{ST}$  (B.S. Weir & Cockerham, 1984) were calculated with SNPRelate.

199

## 200 **Gene flow and migration analyses**

### 201 *Migration surface estimate*

202 The Estimated Effective Migration Surface (EEMS) v.0.0.9 software (Petkova, Novembre, &  
203 Stephens, 2016) was used to visualize geographic regions with higher or lower than average  
204 levels of gene flow within our dataset. The provided tool *bed2diff* was used to compute the matrix  
205 of genetic dissimilarities, from the dataset pruned for LD produced above. The free Google Maps  
206 api v.3 tool (<http://www.birdtheme.org/useful/v3tool.html>) was used to draw the polygon  
207 outlining the study area in western Europe. EEMS was run with 750 demes in three independent

208 chains of 5 million MCMC iterations with a 1 million iterations burn-in. Results were checked for  
209 MCMC chain convergence visually and through the linear relation between the observed and  
210 fitted values for within- and between-demes estimates using the accompanying R package  
211 rEEMSplots v.0.0.1 (Petkova et al., 2016). The three MCMC chains were combined to produce  
212 maps of effective migration and diversity surfaces with the provided functions in rEEMSplots.  
213

#### 214 *Treatment and analyses of capture-recapture data*

215 In addition to genomic data, recapture data of ringed barn owls across Europe were obtained  
216 from the EURING database (obtained in March 2020; Speek et al. 2001; du Feu et al. 2016).  
217 Specifically, we estimated the frequency of crosses over open water between GB and central and  
218 western Europe, as well as between GB and Ireland. To do so, we kept records of birds that had  
219 been recaptured at least once after ringing (n=94'797 recaptures, n=80'083 individuals, from  
220 1910 to 2019) and filtered the accuracy of the "time of capture" parameter to a period of within  
221 6 weeks of the reported date to exclude potentially unreliable data points. We extracted the  
222 number of birds ringed and recaptured in GB and Ireland, as well as in the countries that  
223 produced or received migrant birds from these islands and central Europe (Belgium, Denmark,  
224 France, Spain, Germany, Switzerland and The Netherlands). Crosses between islands and to/from  
225 the mainland are reported and include birds that were found dead in the sea (n=8). All counts  
226 and percentages reported are relative to the number of individual birds recaptured (rather than  
227 number of recapture events, as a single bird can be recaptured multiple times).

228

#### 229 **Post-glacial species distribution**

230 To support the demographic scenarios tested in the following section, we modelled the past  
231 spatial distribution of barn owls in western Europe, in order to identify the regions of high habitat  
232 suitability at the last glacial maximum (LGM, 20'000 years BP). A complete description of the  
233 models can be found in Supplementary Methods.. Briefly, using Maximum Entropy Modelling

234 (MaxEnt), a presence-only based modelling tool, we built species distribution models (SDM) based  
235 on climatic variables extracted from the WorldClim database (Hijmans, Cameron, Parra, Jones, &  
236 Jarvis, 2005) at 5 arc min resolution. Then, the output of the models was transformed into a  
237 binary map of suitability in which only cells suitable in 90% of the models are presented as such  
238 in the map. All models were then projected to the mid-Holocene (6'000 years BP) and LGM  
239 (20'000 years BP) conditions extracted from WorldClim at the same resolution as current data.  
240 For each timepoint, the results of the models were merged and transformed into a binary map as  
241 for the current data.

242

### 243 **Maximum-likelihood demographic inference**

#### 244 *Data preparation*

245 To discriminate between different demographic scenarios for the colonisation of the British Isles  
246 by barn owls we used the software *fastsimcoal2* (Excoffier, Dupanloup, Huerta-Sánchez, Sousa, &  
247 Foll, 2013; Excoffier & Foll, 2011). Individuals and variants in the dataset used here as input  
248 went through additional filtering steps in an attempt to ensure neutrality and homogeneity  
249 between samples (Sup. Methods). Given their similarity (Fig. 1b&c), the original populations of  
250 France, Denmark and Switzerland were combined into a central European population (EU). The  
251 remaining populations were Portugal (PT), Great Britain (GB) and Ireland (IR), with 8 individuals  
252 each (Sup. Table 1). Population pairwise SFS were produced from the filtered dataset of 739'168  
253 SNP.

254

#### 255 *Demographic scenarios and parameters*

256 Three different scenarios of colonization of central Europe and the British Isles from the Iberian  
257 Peninsula were simulated (Figure 3), distinguishable by the difference in timing and origin of the  
258 insular populations: north-western (NW) European origin, Iberian origin and insular refugium. Each  
259 scenario was further split in two versions (A and B) to accommodate small changes in topology.

260 For all scenarios, wide search ranges for initial simulation parameters were allowed for population  
261 sizes, divergence times and migration rates while accounting for census and geological data (Sup.  
262 Table 7). Splits were preceded by instantaneous bottlenecks, in which the founding population  
263 size was drawn from a log-uniform distribution between 0.01 and 0.5 of current population sizes.  
264 All times were relative to the end of the last glaciation (18'000 years BP, rounded to 6000  
265 generations ago), bounded between the present and the previous demographic event in the  
266 model.

267 In scenario NW European origin A, after an initial post-glaciation size expansion, the ancestral PT  
268 population colonized central Europe. From here, barn owls sequentially reached Great Britain and  
269 Ireland, potentially across the Doggerland land bridge. In version B, a smaller second glacial  
270 refugium is hypothesized to have existed in southern France, above the Pyrenees, as the founder  
271 of the central European population after the glaciation. In both versions, barn owls reached the  
272 British Isles from central Europe. In the Iberian origin scenarios, the insular populations originated  
273 directly from PT. Spatially, this could have taken place across now-submerged land in the Bay of  
274 Biscay, west of current-day France and north of Spain. Genetically, the insular birds would have  
275 been derived from the initial genetic pool in Iberia rather than from the subset in central Europe.  
276 Versions A and B of this scenario differ in the timing of colonization, with Europe being colonized  
277 before the islands in A and after in B. Lastly, the insular refugium scenarios hypothesize a  
278 separate and smaller glacial refugium in the south of the British Isles that would have been the  
279 origin of today's populations on the islands. Such refugia have been described for some  
280 terrestrial organisms albeit not birds (Kelly et al., 2010; Ravinet, Harrod, Eizaguirre, & Prodöhl,  
281 2014; Stewart & Lister, 2001; Teacher et al., 2009). Central Europe would be colonized post-  
282 glacially from PT. In version A and B of this scenario, the second glacial refugium would be part of  
283 an ancestral GB or IR population, respectively.

284 In summary, the NW European origin scenario reflects the shortest overland path based on  
285 current geography, whereas the remaining scenarios attempt to address the whiteness in the  
286 British Isles by avoiding shared ancestry with darker-coloured populations at different time scales,

287 as well as the changes in the coastline during and after the last glaciation. For all scenarios,  
288 migration was allowed between neighbouring populations (Figure 3; Sup. Table 7).

289

### 290 *Demographic inference*

291 Demographic simulations and parameter inference were performed under a composite-likelihood  
292 approach based on the joint site frequency spectrum (SFS) as implemented in *fastsimcoal2*  
293 (Excoffier et al., 2013; Excoffier & Foll, 2011). For each scenario, 100 independent estimations  
294 with different initial values were run (Sup. Methods). The best-fitting scenario was determined  
295 based on Akaike's information criterion (AIC; Akaike 1974) and confirmed through the  
296 examination of the likelihood ranges of each scenario as proposed in Kocher *et al.* (1989). For  
297 the best-fitting scenario, non-parametric bootstrapping was performed to estimate 95%  
298 confidence intervals (CI) of the inferred parameters. For each block-bootstrapped SFS, 50  
299 independent parameter inferences were run for the best-fitting scenario (see Sup. Methods for a  
300 detailed explanation).

301

### 302 **Genome scans of colour-linked genes**

303 Genome-wide scans were used to compare patterns of divergence and diversity between  
304 populations. SNPs were filtered to a minimum derived allelic frequency of 5%, and VCFtools was  
305 used to calculate nucleotide diversity ( $\pi$ ) for each population and to estimate  $F_{ST}$  (B.S. Weir &  
306 Cockerham, 1984) between pairs of populations in 20kb sliding windows with 5kb steps across  
307 the whole genome. For our comparisons, Great Britain and Ireland were combined as British Isles;  
308 France and Switzerland as central Europe. Denmark was not included in the latter due to its  
309 markedly darker phenotype (Fig. 1a). The British Isles were compared to all other groups of  
310 individuals: white in Portugal, intermediate in central Europe and dark rufous in Denmark.  
311 Further, Portugal and Denmark were also compared.

312 In our genomic dataset, owls from the British Isles and Portugal carried the same genotypes at  
313 the *MC1R* mutation (100% V allele) despite there being considerably more variation in colour  
314 among Portuguese individuals (Fig. 1a). As such, we first investigated whether insular individuals  
315 showed particular diversity or divergence at the surrounding positions within the *MC1R* gene that  
316 could relate to their pure white colour. Since the *MC1R* gene in barn owls is particularly GC rich  
317 (San-Jose et al., 2015) and is embedded in a region with a lot of homopolymeric sequences, the  
318 sequencing in this region has a considerably lower coverage than the average of the genome. To  
319 account for this, the scaffold containing this gene was extracted from the raw SNP set and re-  
320 filtered with similar site thresholds as described above, except for allowing 25% overall missing  
321 data (instead of 5%), limiting the minimum individual DP to 5 (instead of 10) and the minimum  
322 minor allelic count to 3. VCFtools was used to calculate nucleotide diversity for each population  
323 and to estimate  $F_{ST}$  (B.S. Weir & Cockerham, 1984) between pairs of populations in 5kb sliding  
324 windows with 1kb steps along this scaffold.

325 Second, to widen our search to other colour-linked genes besides *MC1R*, we mapped 22  
326 autosomal candidate genes (Appendix 3) onto the reference genome using Blast v.2.9.0 (Zhang,  
327 Schwartz, Wagner, & Miller, 2000). Windows including the candidate genes were plotted onto  
328 genomic scans (5kb windows with 1kb step) to check for overlap with peaks or drops in diversity  
329 and/or differentiation.

330

331

## 332 Results

### 333 *MC1R* genotyping and colour measurements

334 Plumage colour comparisons showed that the British Isles have the whitest owls of all measured  
335 European populations (Fig. 1a;  $\chi^2 = 243.28$ ,  $p < 0.001$ ). Most pairwise comparisons were  
336 significantly different after correction, with the exception of between GB and IR owls, and between

337 CH and FR. As for *MC1R* genotyping, notably no I allele was found among the 113 genotyped  
338 individuals of the British Isles indicating it is absent from these populations or at very low  
339 frequency.

340

#### 341 **New reference genome**

342 The new reference genome produced for European barn owl was a near chromosome level  
343 assembly, and has been deposited at DDBJ/ENA/GenBank under the accession  
344 JAEUGV000000000. Sequencing of the new reference genome's PacBio library yielded 7.3  
345 million long reads with a total sum length of unique single molecules of 135 Gbp (N50 > 31Kb)  
346 yielding a realized coverage of 108x. Its assembly with FALCON and FALCON-Unzip resulted in  
347 478 primary contigs partially phased, and 1736 fully phased haplotigs which represented  
348 divergent haplotypes. Optical mapping with Bionano produced a final assembly of 70 scaffolds,  
349 slightly more than the barn owl's karyotype of 46 chromosomes (Ducrest et al., 2020). The final  
350 assembly was 1.25 Gbp long, with an N50 of 36 Mbp and BUSCO score of 96.9% (see Appendix 2  
351 Table 1 for full assembly metrics). In comparison, the previous reference assembly (Ducrest et al.,  
352 2020) had 21,509 scaffolds, with an N50 of 4.6 Mbp.

353

#### 354 **Population structure and genetic diversity**

355 Our dataset was composed of four main genetic clusters identified by individual ancestry  
356 analyses (sNMF) and PCA clustering. Individuals from Portugal (PT), Great Britain (GB) and Ireland  
357 (IR) belonged to their specific population ancestry, while individuals from France (FR), Denmark  
358 (DK) and Switzerland (CH) formed a single central European cluster (Fig. 1b,c; Sup. Fig. 3).  
359 Consistently, the first axis of the PCA opposed PT to GB & IR, as seen with sNMF K=2 (Sup. Fig. 3).  
360 The second axis clustered the central European individuals together and opposed them to PT (Fig.  
361 1b). GB and IR segregate in both the first and second axes. Three barn owls sampled in Ireland  
362 showed a clear genetic signal of belonging to the Great Britain genetic cluster (Fig. 1b,c; Sup. Fig.

363 3). To avoid their interference in estimating allelic frequencies, they were omitted when  
364 estimating diversity and differentiation statistics.

365 Analyses of genetic drift with Treemix yielded a population tree with two branches splitting from  
366 PT. The first is a long branch of drift that divides into GB and IR, while the second, shorter branch,  
367 diversified into the three central European populations (Fig. 4a). Plotting the likelihood of runs  
368 and the standard error (SE) of each tree showed that including one migration event from PT to CH  
369 (migration edge weight = 0.27) considerably increased the fit of the tree to the data (Sup. Fig. 5).

370 The overall  $F_{ST}$  was 0.035. Population pairwise  $F_{ST}$  were the highest between Ireland and central  
371 Europe (Sup. Table 3). Overall, populations within central Europe showed the smallest  
372 differentiation ( $F_{ST}$  below 0.02) and the British Isles had the highest values in comparison to all  
373 mainland populations (Sup. Table 3). Diversity estimates showed higher levels in PT than in any  
374 other population and the British Isles had the lowest (Sup. Table 2). Individual relatedness was  
375 highest within IR, followed by GB (Sup. Fig. 4). On the opposite end, PT had the lowest within-  
376 population relatedness as well as with the other populations, consistent with its higher diversity.

377

### 378 **Migration and gene flow**

379 The English Channel – including the strait of Dover and the southernmost part of the North Sea –  
380 was identified by Estimated Effective Migration Surface (EEMS) as a region with lower than  
381 average gene flow between populations (Fig. 2a). This corridor extended west to the Atlantic.  
382 Furthermore, this analysis highlighted a region of low gene flow between the British and Irish  
383 populations. It put a barrier in Ireland by separating the north from the rest of the island,  
384 effectively isolating the three individuals sampled in Ireland that genetically resemble the British  
385 and clustering them with GB.

386 Analyses of capture-recapture data of ringed owls (N=80'083 individuals, from 1910 to 2019)  
387 revealed that all individuals ringed in Ireland (N=81 individuals) were recaptured in Ireland. As for  
388 GB, the vast majority (99.92%) of its ringed individuals (N=17'903) were also recaptured in GB



389 and only 14 migrated out of the island: seven to Ireland (100% of this island's immigrants) and  
390 seven to mainland Europe (Fig. 2b – Emigrants; Sup. Table 4a). In the opposite direction, GB  
391 received 21 individuals from the mainland (Fig. 2b - Immigrants), specifically from Belgium, the  
392 Netherlands and northern Germany (Sup. Table 4b). Of the immigrant birds, 19 were found dead,  
393 one severely injured with unknown fate, and one breeding. The latter was a female from the  
394 Netherlands, but the fate of its brood is not known. In the mainland, central European countries  
395 show considerably higher exchanges of individuals with each other (Sup. Table 4c) than with GB  
396 (Sup. Table 4b).

397

### 398 **Post-glacial species distribution**

399 Habitat suitability projections for barn owls in the past showed that, at the time of the last  
400 glaciation, there was suitable land for barn owls outside of the known refugium of Iberia from a  
401 climatic perspective (Fig. 4c). Specifically, south of today's British Isles there was a corridor of  
402 suitable land submerged nowadays, as well as along the south and western coasts of France, and  
403 a small cluster inland southern France. At the mid-Holocene (6'000 years BP), the coastline  
404 resembled that of present day, and the distribution of suitable habitat for barn owls resembled  
405 that of nowadays (Fig. 4c).

406

### 407 **Demographic inference**

408 AIC and raw likelihood comparisons showed the Iberian origin B model to be the best at  
409 explaining the SFS of our dataset (Sup. Table 6; Fig. 4b). In this model, an ancestral insular  
410 lineage split from the mainland refugium lineage in Iberia fairly soon after the end of the  
411 glaciation, estimated at approximately 13'000 years ago (95% CI: 7'000-17'000 years BP;  
412 calculated with 3-year generation time). Only much later, the model predicted the split of the  
413 central EU population from PT at 4'000 years BP (95% CI: 1'000-5'000 years BP) and the  
414 separation between GB and IR at 1'200 years BP (95% CI: 220-2'200 years BP). Estimated

415 effective population size was the largest in the PT population, followed by EU, GB and IR (Fig. 4b).  
416 Migration between populations was higher before these split than in recent times (Sup. Table 8;  
417 Ancestral vs Recent migration). Highest recent gene flow was observed from PT to EU, agreeing  
418 with Treemix's first migration event (Sup. Fig. 5). Migration levels between the two islands and  
419 with the mainland were of a similar order of magnitude and less than half of that between  
420 mainland populations, consistent with the two barriers to gene flow identified by EEMS (Fig. 2a).  
421 Point estimates with 95% confidence intervals for all parameters of the best model are provided  
422 (Sup. Table 8), as well as single point estimates for the rest of the models (Sup. Table 7).

423

#### 424 **Genome scans of colour-linked genes**

425 Genome-wide scans revealed some high peaks of differentiation between populations, but none  
426 overlapped with the colour-linked candidate genes tested (Appendix 3). In particular, the *MC1R*  
427 region showed no particular sign of increased differentiation between pairs of populations, nor  
428 drop in diversity, with the exception of the known causal SNP between populations with different  
429 genotypes (Fig. 5b; Appendix 3).

430

## 431 **Discussion**

432 Like most terrestrial species, barn owls are assumed to have colonized the British Isles after the  
433 last glaciation by crossing over Doggerland, a land bridge that connected GB to northern Europe.  
434 In continental Europe, barn owls display a marked latitudinal colour cline maintained through  
435 local adaptation (Antoniazza et al., 2010). However, in the British Isles they are conspicuously  
436 white in comparison to their nearest mainland counterparts questioning whether this is their  
437 source population. The currently held interpretation for their whiteness is a strong selection on  
438 this trait after colonisation. Here we provide evidence for a simpler explanation that does not  
439 require selection. Using whole-genome sequences and demographic simulations, we show that

440 the colour disparity can be explained by the patterns in neutral genetic differentiation, resulting  
441 from an unexpected colonization route to the British Isles. We provide evidence for an early split  
442 of the insular lineage and low levels of gene flow with the mainland. Having found no evidence of  
443 selection on colour in the British Isles, it is plausible that this population has simply remained the  
444 white colour of its founders.

445

#### 446 **Genetic isolation from the mainland**

447 Our results based on whole genomes revealed genetic structure among western European barn  
448 owls despite shallow differentiation for a cosmopolitan bird (overall  $F_{ST}$  0.035) and showed  
449 genome wide genetic isolation between the islands and the mainland, accompanied by low levels  
450 of gene flow and migration. On the mainland, Portugal displayed the highest levels of genetic  
451 diversity (Sup. Table 2) and the largest estimated population size (Figure 4b; Sup. Table 8), in  
452 accordance with its known role as a glacial refugium (Antoniazza et al., 2014). While forming its  
453 own population cluster (Figure 1b,c), we found evidence of considerable gene flow towards  
454 central Europe (Figure 2a, 4a,b; Sup. Table 8), consistent with a recent split between the two  
455 populations (less than 5'000 years BP; Figure 4a) and the relatively low differentiation between  
456 them (Sup. Table 3). This suggests that the Pyrenees are permeable to barn owl migration, unlike  
457 other higher and larger mountain ranges (Machado, Clément, Uva, Goudet, & Roulin, 2018). In  
458 central Europe, barn owl populations appear to be remarkably homogenous genetically, despite  
459 covering a large geographical and colour range (Figure 1, Sup. Table 3), in accordance with  
460 previous studies of continental Europe with traditional markers (Antoniazza et al., 2010), and  
461 supported by capture-recapture data that revealed high amounts of exchanges in central Europe  
462 (Sup. Table 4c).

463 Ireland and GB showed the lowest diversity and estimated effective population sizes in our study  
464 (Fig.4; Sup. Tables 2, 8). Barn owl populations of each island are genetically distinct from each  
465 other as well as from the mainland (Figure 1, 4a; Sup. Table 3). Genomic differentiation (Figure 1,  
466 2a, 4a,b; Sup. Table 3) and capture-recapture data with only a handful of exchanges recorded in

467 the last century (Figure 2b; Sup. Table 4a&b), suggest gene flow with the mainland is low. Specific  
468 analyses highlighted a barrier to gene flow extending from the Celtic Sea, through the English  
469 Channel to the North Sea (Figure 2a), effectively isolating the British Isles from the mainland.  
470 Between the two islands, isolation appears to be recent (less than 2230 years BP; Figure 4a,b;  
471 Sup. Table 8), despite relatively high genetic differentiation (Sup. Table 3) likely exacerbated by  
472 an important effect of genetic drift in such small populations. There is little sign of current  
473 pervasive admixture in either direction (Figure 1c), consistent with the role of the Irish Sea as a  
474 strong barrier. However, there are records of owls from GB migrating into northern parts of Ireland  
475 (Figure 2b – Emigrants), the most easily accessible part of the island, while avoiding major water  
476 bodies by island-hopping from Scotland. Curiously, three of the individuals we sampled in Ireland  
477 for whole-genome sequencing (all sampled from found carcasses) appeared to be genetically  
478 from GB (Figure 1b,c), driving EEMS to place a gene flow barrier nearly along the political border  
479 between the two countries of Ireland instead of the sea (Figure 2a). Northern Ireland appears to  
480 be inhospitable for barn owls, at least in modern times, with only 1 to 3 pairs recorded per year in  
481 the whole country (*Barn Owl Report*, 2019). It could be acting as an extension of the sea barrier  
482 with the birds that fly in from GB being unable to find mates and thus not contributing to the  
483 genetic pool of the southern population, accentuating the differentiation between the two islands.

484

#### 485 **Disparity in plumage colouration**

486 Plumage colouration in barn owls, and the linked *MC1R* locus, follow a clinal distribution in  
487 continental Europe maintained by local adaptation (Antoniazza et al., 2010; Burri et al., 2016).  
488 Here, we formally establish that barn owls from the British Isles do not follow the continental  
489 latitudinal cline and are whiter than any continental population in Europe, including even Portugal  
490 (Figure 1a), confirming what was previously untested common knowledge among ornithologists.  
491 The rufous *MC1R* allele appears to be virtually absent in these populations in contrast to its close  
492 to 50% frequency at similar latitudes on the mainland, where dark morphs are positively selected  
493 (Figure 1a; Antoniazza et al. 2014; Burri et al. 2016). While genome-wide scans confirmed the

494 important role of the known *MC1R* mutation in determining rufous colouration (Figure 5a), it  
495 appears to be restricted to the SNP variant itself and not the adjacent genomic regions (Figure  
496 5b). Our results are consistent with previous studies that showed that carrying a single copy of  
497 the rufous allele is sufficient to ensure a darker phenotype, while individuals homozygous for the  
498 white allele can have a wide range of colouration (Burri et al., 2016; San-Jose et al., 2015).

499 This colour trait is likely polygenic, given that the known *MC1R* mutation explains only 30% of its  
500 variation (Burri et al., 2016; San-Jose et al., 2015) and its high heritability (Roulin & Dijkstra,  
501 2003). Other loci could act in conjunction with a homozygous white *MC1R* to either produce  
502 whiter birds in GB or slightly darker morphs in Iberia. However, none of the other known colour-  
503 linked genes tested here explain how white owls homozygous for the white *MC1R* allele from  
504 Portugal reach darker phenotypes than those of the British Isles (Figure 1a, 5a; Appendix 3).  
505 Alternatively, it is conceivable that the phenotype we observe – colouration – simply reflects the  
506 pleiotropic effect of insular local adaptation on other linked cryptic traits. The melanocortin  
507 system regulates behaviour and physiology alongside the production of melanin, and associations  
508 between these traits are common among vertebrates (Ducrest, Keller, & Roulin, 2008; Roulin &  
509 Ducrest, 2011). Further work, potentially focusing on colour-varied populations to avoid the  
510 confounding factor of population structure could help elucidate the genetic basis of barn owl  
511 plumage colouration. If such other loci are found, it would be fascinating to investigate their  
512 distributions and interaction with *MC1R* along the continental colour cline as well as on the  
513 British Isles.

514

### 515 **Colonisation of the British Isles**

516 Demographic simulations based on neutral sites showed that the British Isles were colonized  
517 from the glacial refugium in the Iberian Peninsula soon after the end of the glaciation (Figure 3b).  
518 This would have occurred while the British Isles were still connected to the mainland and the  
519 landmass extended considerably further south than today's islands, following a corridor of  
520 suitable climatic conditions along the coast leading west (Figure 4c) completely separate from

521 Doggerland. It is also possible that this corridor was already occupied by barn owls in a  
522 continuous population with Iberia before becoming isolated, as this species easily maintains high  
523 over-land gene flow (Figure 1b&c, 2a; Sup. Table 4c). Our wide confidence intervals make it hard  
524 to pin-point exactly the time of the actual split between the insular lineage from that of Iberia, but  
525 with the fast rise of sea levels and opening of the delta in the English Channel, the southern route  
526 to the islands would have been closed by 10'000 years BP (Lambeck, Rouby, Purcell, Sun, &  
527 Sambridge, 2014; Leorri, Cearreta, & Milne, 2012). Crucially, at this time prey would already be  
528 available in the form of voles, shrews, lemmings and bats (Montgomery et al., 2014). Once  
529 separated, the insular lineage underwent a long period of genetic drift, isolated from the  
530 mainland population in Iberia but homogenous within itself before splitting between the two  
531 islands (Figure 4a,b).

532 On the mainland, central European populations split genetically from the Iberian refugium much  
533 later (less than 5'000 years BP). Large population sizes and high overland gene flow (Figure 4b;  
534 Sup. Table 8) might thus have maintained low differentiation for a long period of time, but also  
535 climatic conditions north of the Pyrenees may have taken longer to become favourable. The latter  
536 hypothesis would further counter the traditional point of view of Doggerland as the point of arrival  
537 for barn owls, as they could have not yet reached such high latitudes before Doggerland  
538 submerged 8'000 years BP. Intriguingly, our demographic model predicts high migration from GB  
539 into central Europe between the splits of the latter with Iberia and between the two islands  
540 (Figure 4b), which appears unlikely with all land bridges submerged at this point (less than 5'000  
541 years BP). It is possible that the migration rate was inflated as the model did not allow for gene  
542 flow between the ancestral insular and mainland populations before the first split and thus forced  
543 all migration to occur in a short time interval (Figure 3).

544 In light of the inferred demographic history, barn owls of the British Isles would have inherited  
545 their whiteness from their source mainland population, the refugium in the Iberian Peninsula, and  
546 kept it through small population size, genetic drift and low gene flow. Although it is conceivable  
547 that some copies of the rufous *MC1R* allele were present in the founding insular population,

548 similar to its frequency in Iberia (1%; Figure 1a), in the absence of strong positive selection in the  
549 insular environment, it could have disappeared through genetic drift given the small effective  
550 sizes (Figure 4b; Sup. Table 8). Thus, the selective pressure that renders the rufous colour and  
551 allele adaptive in northern continental Europe (Antoniazza et al., 2010; Burri et al., 2016), may be  
552 absent in the British Isles. Still, we cannot rule out that gene flow with the mainland is too weak  
553 and over too short a period of time to offer selection sufficient variation in the British Isles to  
554 increase the frequency of imported rufous alleles. If, conversely, the white morph was positively  
555 selected on the islands – potentially explaining its purer shade – we would have expected to find  
556 extended haplotypic differentiation when comparing it to the white mainland birds, which we did  
557 not (Figure 5; Appendix 3). Therefore, it appears the white insular morph can be most  
558 parsimoniously explained by relaxation or absence of selective pressure in contrast to the  
559 mainland. Such a pattern is actually common among insular birds which, due to relaxed selection,  
560 tend to display less colourful plumage than their mainland counterparts (Doutrelant et al., 2016;  
561 Grant, 1965), as also observed in the barn owl worldwide (Romano, Séchaud, & Roulin, 2021).

562 This early history of colonisation of the British Isles inferred here from whole-genome sequences  
563 and supported by SDM projections on past climatic features is apparently unique among  
564 terrestrial vertebrates, but it is far from the first to deviate from the most common colonisation  
565 route over Doggerland (e.g. Boston et al., 2015; Kelly et al., 2010; Snell et al., 2005; Stewart &  
566 Lister, 2001; Teacher et al., 2009) or to indicate an earlier colonisation than generally assumed  
567 (Martínková et al., 2007; McDevitt et al., 2020). The case of the stoat (*Mustela erminea*) is  
568 particularly interesting as it was found to have had an isolated glacial refugium also in now  
569 submerged land southwest of today's French coastline on the Bay of Biscay (Figure 4c – LGM;  
570 Martínková et al. 2007). From there they reached Ireland very early as the temperatures started  
571 rising but, as the Celtic Sea opened 15'000 years BP, only colonized GB much later over  
572 Doggerland (Martínková et al., 2007). The key difference between the two cases lies in the fact  
573 that barn owls maintained a homogenous population between GB and Ireland through flight.

574

## 575 **Conclusion**

576 Our study demonstrates that barn owls followed a highly uncommon post-glacial colonisation  
577 route to the British Isles. Likely taking advantage of the since submerged suitable habitat on the  
578 Bay of Biscay, barn owls reached the islands much earlier than expected from this southern point.  
579 The inferred demographic history could explain the whiteness of these populations through a  
580 combination of founder effect and low gene flow, and without the need to invoke selective  
581 pressures. We contend high quality population genomic data associated with species distribution  
582 hindcasting will reveal an unusual demographic history and post-glacial colonization for many  
583 non-model species. We wonder how often an intuitive selective explanation for a conspicuous  
584 phenotype could turn out to be the result of purely neutral processes.

585

## 586 **Acknowledgements**

587 We are grateful to the following institutions and individuals that provided samples or aided in  
588 sampling to our study: Barn Owl Trust (Devon, UK), BirdWatch Ireland (Kilcoole, IE), National  
589 University of Ireland (Galway, IE), The European Barn Owl Network, CHENE Association (Seine-  
590 Maritime, FR), Burke Museum of Natural History and Culture (Washington, USA), San Diego  
591 Natural history Museum (California, USA), the late Richard F. Shore, Emy Guibault, Sylvain  
592 Antoniazza and Reto Burri. We thank Céline Simon, Guillaume Dumont, Luis San-José, Valérie  
593 Ducret and Kathleen Salin for their valuable assistance with molecular work. Finally, we thank  
594 Laurent Excoffier and Nina Marchi for their assistance with demographic inference in  
595 Fastsimcoal2, Olivier Broennimann for his advice and review of the SDM, and John Pannell for  
596 insightful review of the manuscript. This study was funded by the Swiss National Science  
597 Foundation with grants 31003A\_138180 & 31003A\_179358 to JG and 31003A\_173178 to AR.

598

599



## 600 References

- 601 Akaike, H. (1974). A new look at the statistical model identification. *IEEE Transactions on*  
602 *Automatic Control*, 19(6), 716–723. doi: 10.1109/TAC.1974.1100705
- 603 Altwegg, R., Roulin, A., Kestenholz, M., & Jenni, L. (2006). Demographic effects of extreme winter  
604 weather in the barn owl. *Oecologia*, 149(1), 44–51. doi: 10.1007/s00442-006-0430-3
- 605 Antoniazza, S., Burri, R., Fumagalli, L., Goudet, J., & Roulin, A. (2010). Local adaptation maintains  
606 clinal variation in melanin-based coloration of European barn owls (*Tyto alba*). *Evolution*,  
607 64(7), 1944–1954. Retrieved from <http://www.jstor.org/stable/40793087>
- 608 Antoniazza, S., Kanitz, R., Neuenschwander, S., Burri, R., Gaigher, A., Roulin, A., & Goudet, J.  
609 (2014). Natural selection in a postglacial range expansion: The case of the colour cline in  
610 the European barn owl. *Molecular Ecology*, 23(22), 5508–5523. doi: 10.1111/mec.12957
- 611 *Barn Owl Report*. (2019).
- 612 Bilton, D. T., Mirol, P. M., Mascheretti, S., Fredga, K., Zima, J., & Searle, J. B. (1998).  
613 Mediterranean Europe as an area of endemism for small mammals rather than a source for  
614 northwards postglacial colonization. *Proceedings of the Royal Society B: Biological Sciences*,  
615 265(1402), 1219–1226. doi: 10.1098/rspb.1998.0423
- 616 Boston, E. S. M., Ian Montgomery, W., Hynes, R., & Prodöhl, P. A. (2015). New insights on  
617 postglacial colonization in western Europe: The phylogeography of the Leisler's bat (*Nyctalus*  
618 *leisleri*). *Proceedings of the Royal Society B: Biological Sciences*, 282(1804). doi:  
619 10.1098/rspb.2014.2605
- 620 Brace, S., Ruddy, M., Miller, R., Schreve, D. C., Stewart, J. R., & Barnes, I. (2016). The colonization  
621 history of British water vole (*Arvicola amphibius* (Linnaeus, 1758)): Origins and development  
622 of the Celtic fringe. *Proceedings of the Royal Society B: Biological Sciences*, 283(1829). doi:  
623 10.1098/rspb.2016.0130
- 624 Brůna, T., Hoff, K. J., Lomsadze, A., Stanke, M., & Borodovsky, M. (2020). BRAKER2: Automatic  
625 Eukaryotic Genome Annotation with GeneMark-EP+ and AUGUSTUS Supported by a Protein  
626 Database. *BioRxiv*, 2020.08.10.245134. doi: 10.1101/2020.08.10.245134
- 627 Burri, R., Antoniazza, S., Gaigher, A., Ducrest, A.-L., Simon, C., Fumagalli, L., ... Roulin, A. (2016).  
628 The genetic basis of color-related local adaptation in a ring-like colonization around the  
629 Mediterranean. *Evolution*, 70(1), 140–153. doi: 10.1111/evo.12824
- 630 Chin, C. S., Peluso, P., Sedlazeck, F. J., Nattestad, M., Concepcion, G. T., Clum, A., ... Schatz, M. C.  
631 (2016). Phased diploid genome assembly with single-molecule real-time sequencing. *Nature*  
632 *Methods*, 13(12), 1050–1054. doi: 10.1038/nmeth.4035
- 633 Coles, B. J. (1998). Doggerland: a Speculative Survey. *Proceedings of the Prehistoric Society*,  
634 64(January), 45–81. doi: 10.1017/S0079497X00002176
- 635 Deffontaine, V., Libois, R., Kotlík, P., Sommer, R., Nieberding, C., Paradis, E., ... Michaux, J. R.  
636 (2005). Beyond the Mediterranean peninsulas: Evidence of central European glacial refugia  
637 for a temperate forest mammal species, the bank vole (*Clethrionomys glareolus*). *Molecular*  
638 *Ecology*, 14(6), 1727–1739. doi: 10.1111/j.1365-294X.2005.02506.x
- 639 Doutrelant, C., Paquet, M., Renoult, J. P., Grégoire, A., Crochet, P. A., & Covas, R. (2016).  
640 Worldwide patterns of bird colouration on islands. *Ecology Letters*, 19(5), 537–545. doi:  
641 10.1111/ele.12588
- 642 du Feu, C. R., Clark, J. A., Schaub, M., Fiedler, W., & Baillie, S. R. (2016). The EURING Data Bank –  
643 a critical tool for continental-scale studies of marked birds. *Ringing and Migration*, 31(1), 1–  
644 18. doi: 10.1080/03078698.2016.1195205

- 645 Ducrest, A.-L., Keller, L., & Roulin, A. (2008). Pleiotropy in the melanocortin system, coloration and  
646 behavioural syndromes. *Trends in Ecology and Evolution*, Vol. 23, pp. 502–510. doi:  
647 10.1016/j.tree.2008.06.001
- 648 Ducrest, A.-L., Neuenschwander, S., Schmid-Siegert, E., Pagni, M., Train, C., Dylus, D., ... Goudet, J.  
649 (2020). New genome assembly of the barn owl (*Tyto alba alba*). *Ecology and Evolution*,  
650 10(5), 2284–2298. doi: 10.1002/ece3.5991
- 651 Excoffier, L., Dupanloup, I., Huerta-Sánchez, E., Sousa, V. C., & Foll, M. (2013). Robust  
652 Demographic Inference from Genomic and SNP Data. *PLoS Genetics*, 9(10), 1003905. doi:  
653 10.1371/journal.pgen.1003905
- 654 Excoffier, L., & Foll, M. (2011). fastsimcoal: A continuous-time coalescent simulator of genomic  
655 diversity under arbitrarily complex evolutionary scenarios. *Bioinformatics*, 27(9), 1332–  
656 1334. doi: 10.1093/bioinformatics/btr124
- 657 Ficetola, G. F., Mazel, F., & Thuiller, W. (2017). Global determinants of zoogeographical  
658 boundaries. *Nature Ecology and Evolution*, 1(4), 89. doi: 10.1038/s41559-017-0089
- 659 Frichot, E., Mathieu, F., Trouillon, T., Bouchard, G., & François, O. (2014). Fast and efficient  
660 estimation of individual ancestry coefficients. *Genetics*, 196(4), 973–983. doi:  
661 10.1534/genetics.113.160572
- 662 García-Vázquez, A., Pinto Llona, A. C., & Grandal-d'Anglade, A. (2019). Post-glacial colonization of  
663 Western Europe brown bears from a cryptic Atlantic refugium out of the Iberian Peninsula.  
664 *Historical Biology*, 31(5), 618–630. doi: 10.1080/08912963.2017.1384473
- 665 Grant, P. R. (1965). Plumage and the Evolution of Birds on Islands. *R. Grant Source: Systematic  
666 Zoology*, 14(1), 47–52. Retrieved from <http://www.jstor.org/stable/2411902>
- 667 Herman, J. S., Jóhannesdóttir, F., Jones, E. P., Mcdevitt, A. D., Michaux, J. R., White, T. A., ...  
668 Searle, J. B. (2017). Post-glacial colonization of Europe by the wood mouse, *Apodemus  
669 sylvaticus*: Evidence of a northern refugium and dispersal with humans. *Biological Journal of  
670 the Linnean Society*, 120(2), 313–332. doi: 10.1111/bij.12882
- 671 Hewitt, G. M. (1999). Postglacial re-colonisation of European biota. *Biological Journal of the  
672 Linnean Society*, 68, 87–112. doi: 10.1111/j.1095-8312.1999.tb01160.x
- 673 Hewitt, G. M. (2000). The genetic legacy of the Quaternary ice ages. *Nature*, 405(6789), 907–  
674 913. doi: 10.1038/35016000
- 675 Hewitt, G. M. (2011). Mediterranean Peninsulas: The Evolution of Hotspots. In F. E. Zachos & J. C.  
676 Habel (Eds.), *Biodiversity Hotspots* (pp. 123–147). Berlin, Heidelberg: Springer Berlin  
677 Heidelberg. doi: 10.1007/978-3-642-20992-5\_7
- 678 Hijmans, R. J., Cameron, S. E., Parra, J. L., Jones, P. G., & Jarvis, A. (2005). Very high resolution  
679 interpolated climate surfaces for global land areas. *International Journal of Climatology*,  
680 25(15), 1965–1978. doi: 10.1002/joc.1276
- 681 Hoff, K. J., Lange, S., Lomsadze, A., Borodovsky, M., & Stanke, M. (2016). BRAKER1:  
682 Unsupervised RNA-Seq-Based Genome Annotation with GeneMark-ET and AUGUSTUS.  
683 *Bioinformatics*, 32(5), 767–769. doi: 10.1093/bioinformatics/btv661
- 684 Hoff, K. J., Lomsadze, A., Borodovsky, M., & Stanke, M. (2019). Whole-Genome Annotation with  
685 BRAKER. In M. Kollmar (Ed.), *Gene Prediction: Methods and Protocols* (pp. 65–95). New  
686 York, NY: Springer New York. doi: 10.1007/978-1-4939-9173-0\_5
- 687 Kelly, A., Charman, D. J., & Newnham, R. M. (2010). A last glacial maximum pollen record from  
688 bodmin moor showing a possible cryptic Northern refugium in Southwest England. *Journal of  
689 Quaternary Science*, 25(3), 296–308. doi: 10.1002/jqs.1309

- 690 Kocher, T., Thomas, W., Meyer, A., Edwards, S., Pääbo, S., Villablanca, F., & Wilson, A. (1989).  
691 Dynamics of mitochondrial DNA evolution in animals : Amplification and sequencing with  
692 conserved primers. *Proceedings of the National Academy of Sciences of the United States of*  
693 *America*, 86, 6196–6200.
- 694 Lambeck, K., Rouby, H., Purcell, A., Sun, Y., & Sambridge, M. (2014). Sea level and global ice  
695 volumes from the Last Glacial Maximum to the Holocene. *Proceedings of the National*  
696 *Academy of Sciences of the United States of America*, 111(43), 15296–15303. doi:  
697 10.1073/pnas.14111762111
- 698 Leorri, E., Cearreta, A., & Milne, G. (2012). Field observations and modelling of Holocene sea-level  
699 changes in the southern Bay of Biscay: Implication for understanding current rates of  
700 relative sea-level change and vertical land motion along the Atlantic coast of SW Europe.  
701 *Quaternary Science Reviews*, 42, 59–73. doi: 10.1016/j.quascirev.2012.03.014
- 702 Lister, A. M. (1984). Evolutionary and ecological origins of British deer. *Proceedings of the Royal*  
703 *Society of Edinburgh. Section B. Biological Sciences*, 82(4), 205–229. doi:  
704 10.1017/s0269727000003754
- 705 Machado, A. P., Clément, L., Uva, V., Goudet, J., & Roulin, A. (2018). The Rocky Mountains as a  
706 dispersal barrier between barn owl (*Tyto alba*) populations in North America. *Journal of*  
707 *Biogeography*, (45), 1288–1300. doi: 10.1111/jbi.13219
- 708 Martin, J. R. (2017). *The Barn Owl: Guardian of the Countryside*. Whittet Books. Retrieved from  
709 <http://library1.nida.ac.th/termpaper6/sd/2554/19755.pdf>
- 710 Martínková, N., McDonald, R. A., & Searle, J. B. (2007). Stoats (*Mustela erminea*) provide  
711 evidence of natural overland colonization of Ireland. *Proceedings of the Royal Society B:*  
712 *Biological Sciences*, 274(1616), 1387–1393. doi: 10.1098/rspb.2007.0334
- 713 McDevitt, A., Coscia, I., Browett, S., Ruiz-González, A., Statham, M., Ruczyńska, I., ... Wójcik, J.  
714 (2020). Next-generation phylogeography resolves post-glacial colonization patterns in a  
715 widespread carnivore, the red fox (*Vulpes vulpes*), in Europe. *BioRxiv*. doi:  
716 10.1101/2020.02.21.954966
- 717 Montgomery, W. I., Provan, J., McCabe, A. M., & Yalden, D. W. (2014). Origin of British and Irish  
718 mammals: Disparate post-glacial colonisation and species introductions. *Quaternary*  
719 *Science Reviews*, 98, 144–165. doi: 10.1016/j.quascirev.2014.05.026
- 720 O'Meara, D. B., Edwards, C. J., Sleeman, D. P., Cross, T. F., Statham, M. J., McDowell, J. R., ...  
721 Carlsson, J. (2012). Genetic structure of Eurasian badgers *Meles meles* (Carnivora:  
722 Mustelidae) and the colonization history of Ireland. *Biological Journal of the Linnean Society*,  
723 106(4), 893–909. doi: 10.1111/j.1095-8312.2012.01927.x
- 724 Petkova, D., Novembre, J., & Stephens, M. (2016). Visualizing spatial population structure with  
725 estimated effective migration surfaces. *Nature Genetics*, 48(1), 94–100. doi:  
726 10.1038/ng.3464
- 727 Pickrell, J., & Pritchard, J. (2012). Inference of population splits and mixtures from genome-wide  
728 allele frequency data. *Nature Precedings*. doi: 10.1038/npre.2012.6956.1
- 729 Purcell, S., Neale, B., Todd-Brown, K., Thomas, L., Ferreira, M. A. R., Bender, D., ... Sham, P. C.  
730 (2007). PLINK: A Tool Set for Whole-Genome Association and Population-Based Linkage  
731 Analyses. *The American Journal of Human Genetics*, 81(3), 559–575. doi:  
732 10.1086/519795
- 733 Ravinet, M., Harrod, C., Eizaguirre, C., & Prodöhl, P. A. (2014). Unique mitochondrial DNA lineages  
734 in Irish stickleback populations: Cryptic refugium or rapid recolonization? *Ecology and*  
735 *Evolution*, 4(12), 2488–2504. doi: 10.1002/ece3.853
- 736 Romano, A., Séchaud, R., & Roulin, A. (2021). Evolution of wing length and melanin-based

- 737 coloration in insular populations of a cosmopolitan raptor. *Journal of Biogeography*, 48(4),  
738 961–973. doi: 10.1111/jbi.14053
- 739 Roulin, A. (2013). Ring recoveries of dead birds confirm that darker pheomelanic Barn Owls  
740 disperse longer distances. *Journal of Ornithology*, 154(3), 871–874. doi: 10.1007/s10336-  
741 013-0949-0
- 742 Roulin, A., & Dijkstra, C. (2003). Genetic and environmental components of variation in  
743 eumelanin and phaeomelanin sex-traits in the barn owl. *Heredity*, 90(5), 359–364. doi:  
744 10.1038/sj.hdy.6800260
- 745 Roulin, A., & Ducrest, A.-L. (2011). Association between melanism, physiology and behaviour: A  
746 role for the melanocortin system. *European Journal of Pharmacology*, 660(1), 226–233. doi:  
747 10.1016/j.ejphar.2011.01.036
- 748 Roulin, A., & Randin, C. F. (2016). Barn owls display larger black feather spots in cooler regions of  
749 the British Isles. *Biological Journal of the Linnean Society*. doi: 10.1111/bij.12814
- 750 San-Jose, L. M., Ducrest, A.-L., Ducret, V., Béziers, P., Simon, C., Wakamatsu, K., & Roulin, A.  
751 (2015). Effect of the MC1R gene on sexual dimorphism in melanin-based colorations.  
752 *Molecular Ecology*, 24(11), 2794–2808. doi: 10.1111/mec.13193
- 753 Smit, A. F., & Hubley, R. (2013-2015). RepeatModeler Open-1.0. Retrieved from  
754 <http://www.repeatmasker.org>
- 755 Smit, A. F., Hubley, R., & Green, P. (2008-2015). RepeatMasker Open-4.0. Retrieved from  
756 <http://www.repeatmasker.org>
- 757 Snell, C., Tetteh, J., & Evans, I. H. (2005). Phylogeography of the pool frog (*Rana lessonae*  
758 Camerano) in Europe: Evidence for native status in Great Britain and for an unusual  
759 postglacial colonization route. *Biological Journal of the Linnean Society*, 85(1), 41–51. doi:  
760 10.1111/j.1095-8312.2005.00471.x
- 761 Speek, G., Clark, J. A., Rohde, Z., Wassenaar, R., & Van Noordwijk, A. J. (2001). *The EURING*  
762 *exchange-code 2000*. Heteren.
- 763 Stanke, M., Diekhans, M., Baertsch, R., & Haussler, D. (2008). Using native and syntenically  
764 mapped cDNA alignments to improve de novo gene finding. *Bioinformatics (Oxford,*  
765 *England)*, 24(5), 637–644. doi: 10.1093/bioinformatics/btn013
- 766 Stanke, M., Schöffmann, O., Morgenstern, B., & Waack, S. (2006). Gene prediction in eukaryotes  
767 with a generalized hidden Markov model that uses hints from external sources. *BMC*  
768 *Bioinformatics*, 7(1), 62. doi: 10.1186/1471-2105-7-62
- 769 Stewart, J. R., & Lister, A. M. (2001). Cryptic northern refugia and the origins of the modern biota.  
770 *Trends in Ecology and Evolution*, 16(11), 608–613. doi: 10.1016/S0169-5347(01)02338-2
- 771 Taberlet, P., Fumagalli, L., Wust-Saucy, A. G., & Cosson, J. F. (1998). Comparative phylogeography  
772 and postglacial colonization routes in Europe. *Molecular Ecology*, 7(4), 453–464. doi:  
773 10.1046/j.1365-294x.1998.00289.x
- 774 Teacher, A. G. F., Garner, T. W. J., & Nichols, R. A. (2009). European phylogeography of the  
775 common frog (*Rana temporaria*): Routes of postglacial colonization into the British Isles, and  
776 evidence for an Irish glacial refugium. *Heredity*, 102(5), 490–496. doi:  
777 10.1038/hdy.2008.133
- 778 van den Brink, V., Dreiss, A. N., & Roulin, A. (2012). Melanin-based coloration predicts natal  
779 dispersal in the barn owl, *Tyto alba*. *Animal Behaviour*, 84(4), 805–812. doi:  
780 10.1016/j.anbehav.2012.07.001
- 781 Van der Auwera, G. A., Carneiro, M. O., Hartl, C., Poplin, R., del Angel, G., Levy-Moonshine, A., ...

- 782 DePristo, M. A. (2013). From FastQ data to high-confidence variant calls: The genome  
783 analysis toolkit best practices pipeline. *Current Protocols in Bioinformatics*, 43(SUPL.43),  
784 11.10.1-11.10.33. doi: 10.1002/0471250953.bi1110s43
- 785 Ward, I., Larcombe, P., & Lillie, M. (2006). The dating of Doggerland – post-glacial geochronology  
786 of the southern North Sea. *Environmental Archaeology*, 11(2), 207–218. doi:  
787 10.1179/174963106x123214
- 788 Weir, B.S., & Cockerham, C. C. (1984). Estimating F-statistics for the analysis of population  
789 structure. *Evolution*, 38(6), 1358–1370. doi: 10.2307/2408641
- 790 Weir, Bruce S, & Goudet, J. (2017). A unified characterization of population structure and  
791 relatedness. *Genetics*, 206(4), 2085–2103. doi: 10.1534/genetics.116.198424
- 792 Zhang, Z., Schwartz, S., Wagner, L., & Miller, W. (2000). A greedy algorithm for aligning DNA  
793 sequences. *Journal of Computational Biology*, Vol. 7, pp. 203–214. Mary Ann Liebert, Inc.  
794 Pp. doi: 10.1089/10665270050081478
- 795 Zheng, X., Levine, D., Shen, J., Gogarten, S. M., Laurie, C., & Weir, B. S. (2012). A high-  
796 performance computing toolset for relatedness and principal component analysis of SNP  
797 data. *Bioinformatics*, 28(24), 3326–3328. doi: 10.1093/bioinformatics/bts606

798

799

800

801

## 802 Data Accessibility

803 The new reference genome for European barn owl (*Tyto alba*) has been deposited at  
804 DDBJ/ENA/GenBank under the accession JAEUGV000000000, and the corresponding PacBio  
805 reads in the BioProject PRJNA694553. The raw Illumina reads for the whole-genome sequenced  
806 individuals are available in BioProject PRJNA700797. Colour and MC1R data are provided in  
807 Appendix 1.

808

## 809 Author Contributions

810 APM, TC, AR, JG designed this study; APM produced whole-genome resequencing libraries; APM,  
811 TC conducted the analyses; ALD, MD produced the new reference genome; CI, EB, NG assembled  
812 it; TC identified coding regions; KD, RL, JL, HDM, LP and DR provided samples to the study; APM  
813 led the writing of the manuscript with input from all authors.

814 **Figures**

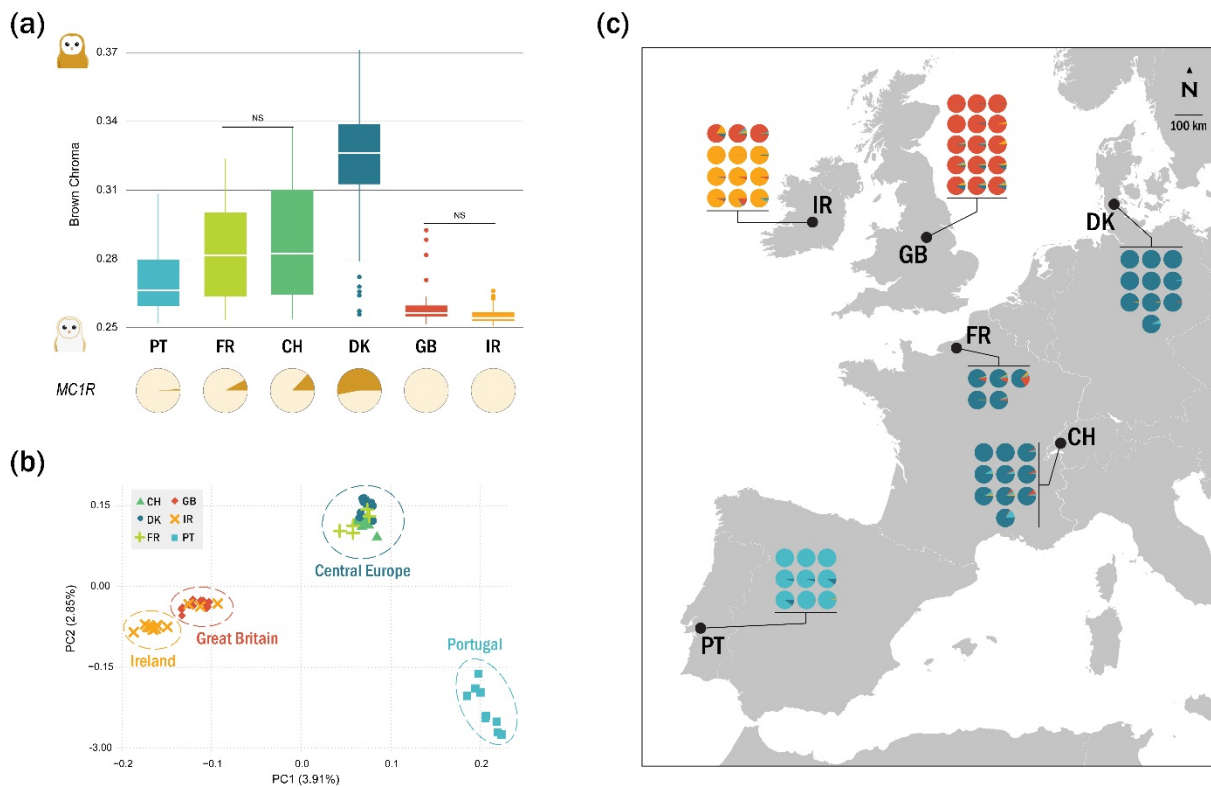

815

816

817 **Figure 1** – Colouration and genetic structure of barn owl populations in western Europe. (a) Brown  
 818 chroma distribution and *MC1R* allelic frequencies of each studied population (total  $N=145$ ).  
 819 Higher brown chroma indicates redder owls. NS denotes the non-significant pairwise  
 820 comparisons. The pies below the plot illustrate the populations' *MC1R* allelic frequencies: the  
 821 rufous allele in brown and the white in beige. (b) PCA based on the pruned SNP set of the 61  
 822 individuals whose whole genome was re-sequenced. Point shape and colour denote populations  
 823 according to the legend. Dashed circles enclose sample clusters identified in sNMF. Values in  
 824 parenthesis indicate the percentage of variance explained by each axis. (c) Population structure.  
 825 Small pie charts denote the individual proportion of each of  $k=4$  lineages as determined by sNMF.  
 826 Black dots are located at the approximate centroid of each sampled population.

827

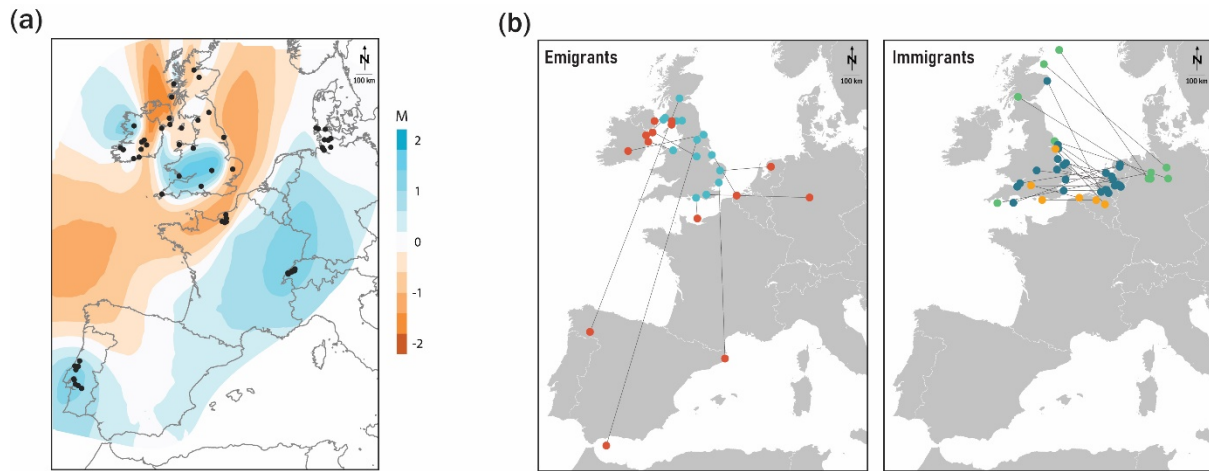

828

829 **Figure 2** – Barn owl gene flow and dispersal between the British Isles and mainland Western  
830 Europe. **(a)** Estimated effective migration surface (EEMS) based on whole-genome data. Blue and  
831 orange shading denote regions of higher and lower than average gene flow, respectively. Black  
832 dots indicate individual sampling location. **(b)** Ringing and recapture locations of barn owls known  
833 to have flown out of (Emigrants) or into (Immigrants) Great Britain from 1910 to 2019, based on  
834 data courtesy of EURING. Lines simply connect two capture points and do not represent the  
835 actual path travelled by birds. Emigrant ringing locations in GB are coloured in blue, and  
836 recaptures in red. Immigrants into GB are coloured according to country of origin (orange –  
837 Belgium; green – Germany; blue – The Netherlands).

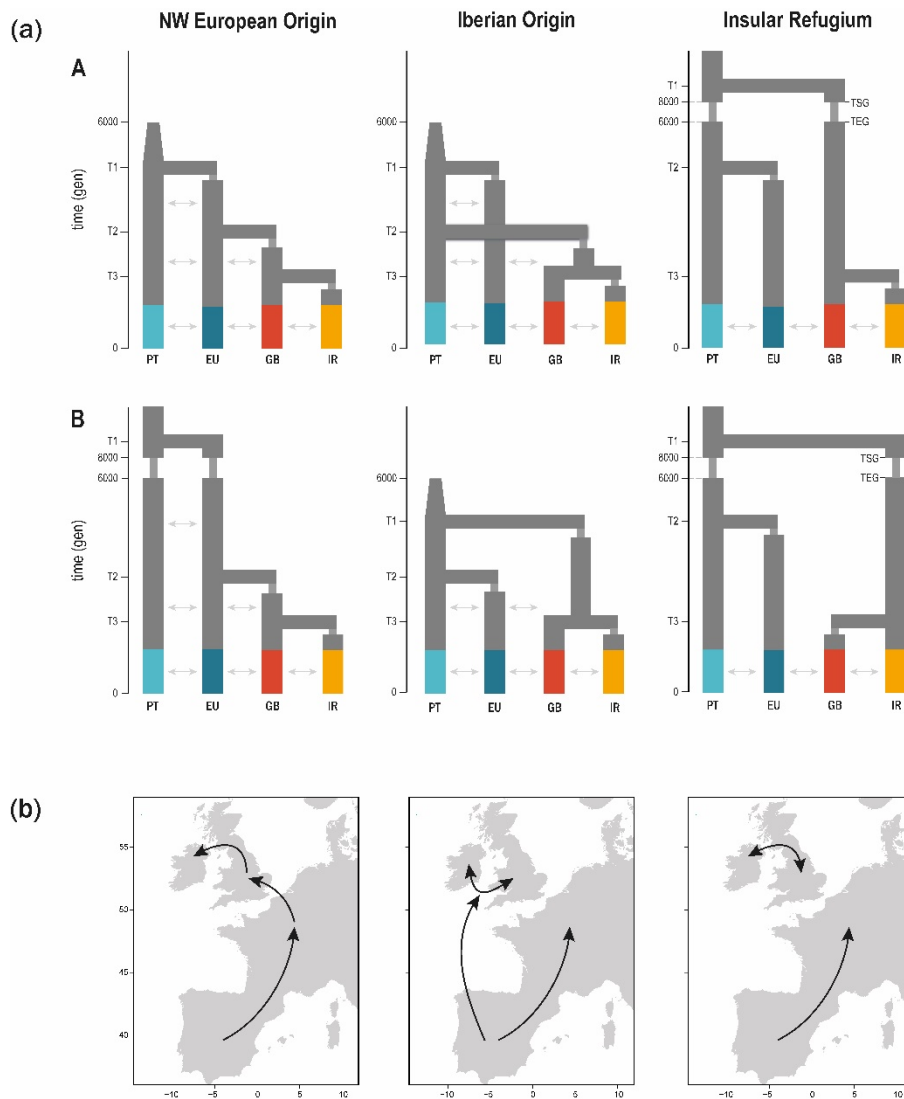

838

839 **Figure 3** – Hypothesized demographic scenarios for the colonization of the British Isles by barn  
 840 owls. (a) Tested demographic scenarios for the colonization of the British Isles by barn owls. There  
 841 are three main topologies – NW European Origin, Iberian Origin and Insular Refugium – each with  
 842 two version (A & B; first and second line respectively). The four main genetic clusters in our  
 843 dataset were used: Portugal (PT), Central Europe (EU), Great Britain (GB) and Ireland (IR).  
 844 Population EU in this analysis is composed of individuals from FR and DK. Indicated times were  
 845 fixed in the models (6'000 and 8'000 generations ago), and the remaining time parameters were  
 846 inferred relative to them or to the event immediately before (e.g., T3 was bound between the  
 847 present and T2). Cones depict post-glacial size increase and arrows gene flow between adjacent  
 848 populations. In Insular Refugium topologies, TSG= time of start of glaciation in the insular lineage,  
 849 TEG= time of end of glaciation in the insular lineage. (b) Schematic representation of the  
 850 colonisation route to the British Isles for each scenario.

851



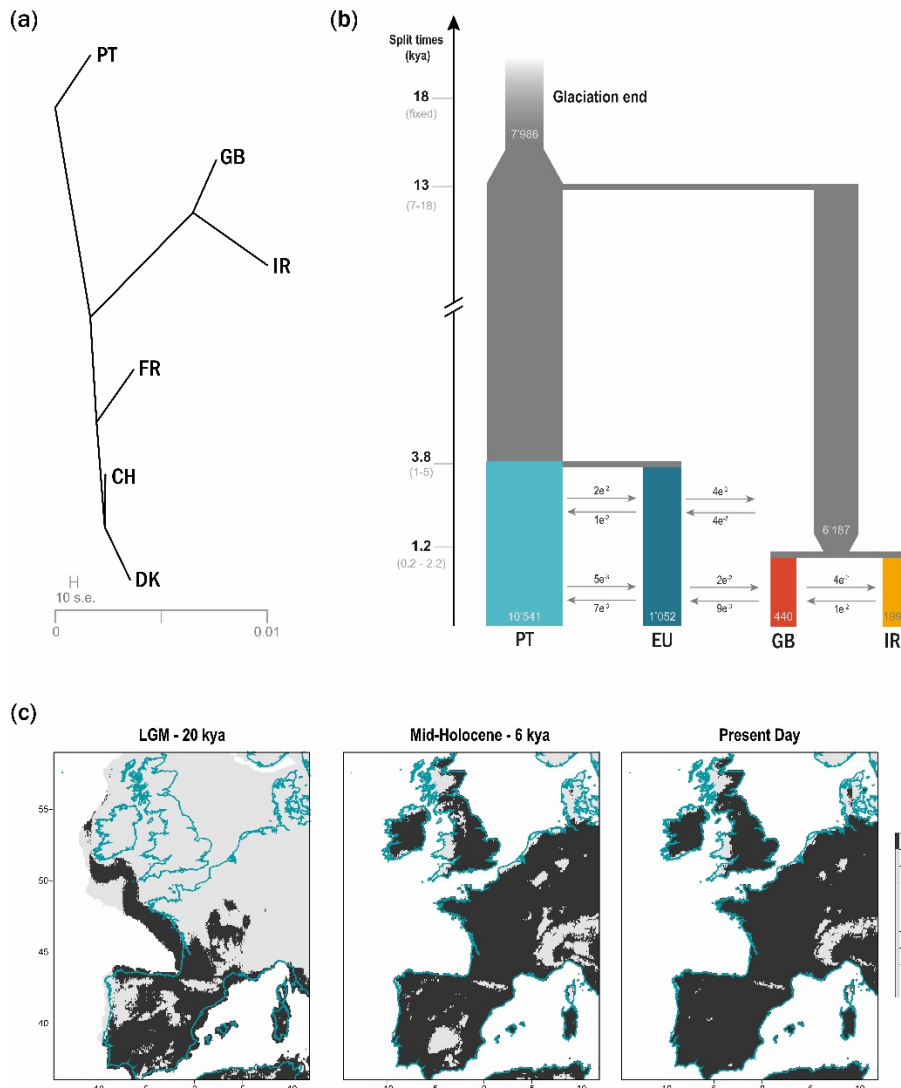

852

853 **Figure 4** – Demographic history of barn owls of the British Isles. **(a)** Treemix analysis with zero  
 854 migration events. **(b)** Best supported demographic model for the colonisation of the British Isles  
 855 as determined by fastsimcoal2. Time is indicated in thousands of years, with a 3-year generation  
 856 time, confidence intervals at 95% are given between brackets. Population sizes (haploid) are  
 857 shown inside each population bar; arrows indicate forward-in-time migration rate and direction.  
 858 Population EU in this analysis is composed of individuals from FR and DK. **(c)** Species distribution  
 859 model of barn owls projected into past conditions – last glacial maximum (20'000 years BP) and  
 860 mid-Holocene (6'000 years BP) – compared to today's distribution. Only locations with high  
 861 suitability in at least 90% model averaging are coloured in dark grey. Below that threshold cells  
 862 were considered as unsuitable (lightest grey shade on the graph). Modern coastline is shown in  
 863 blue.

864

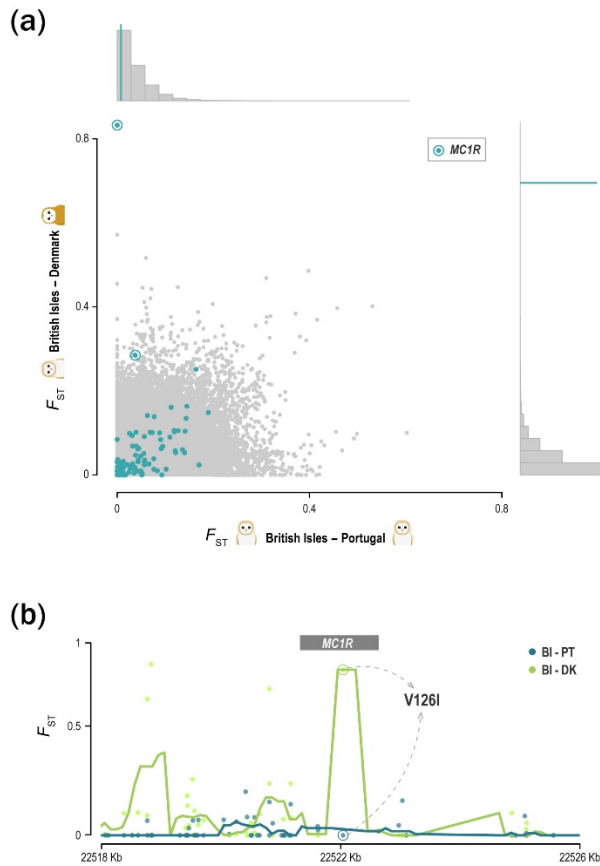

865

866

867 **Figure 5**– Differentiation at the colour-linked locus V126I of the *MC1R* gene between differently  
868 coloured barn owl populations in Europe. **(a)** Genome-wide  $F_{ST}$  values per window (in grey, 20Kbp  
869 windows with 5Kbp steps), between two white barn owl populations on the horizontal axis –  
870 British Isles (BI) and Portugal (PT) – and between one white and one rufous on the vertical axis –  
871 BI and Denmark (DK). The distribution of each axis is shown on the histograms. Blue dots indicate  
872 the  $F_{ST}$  at windows containing the tested colour-linked genes. Windows containing the *MC1R* are  
873 encircled, and their mean is shown with the blue line on the histograms. **(b)**  $F_{ST}$  per site (dots)  
874 around the *MC1R* gene (grey box). Lines show the mean over sliding windows (500bp with 100bp  
875 step), for the same comparisons as above: BI and PT in blue; BI and DK in green. Circled dots  
876 indicate the V126I locus in both comparisons.
