# Supplementary material for: Unexpected post-glacial colonisation route explains the white colour of barn owls (Tyto alba) from the British Isles
Source: bioRxiv or medRxiv preprint supplement (doi:10.1101/2021.04.23.441058), 2021-04-23

1 **APPENDIX 3 – Genome-wide scans and focus on colour-linked genes**

2

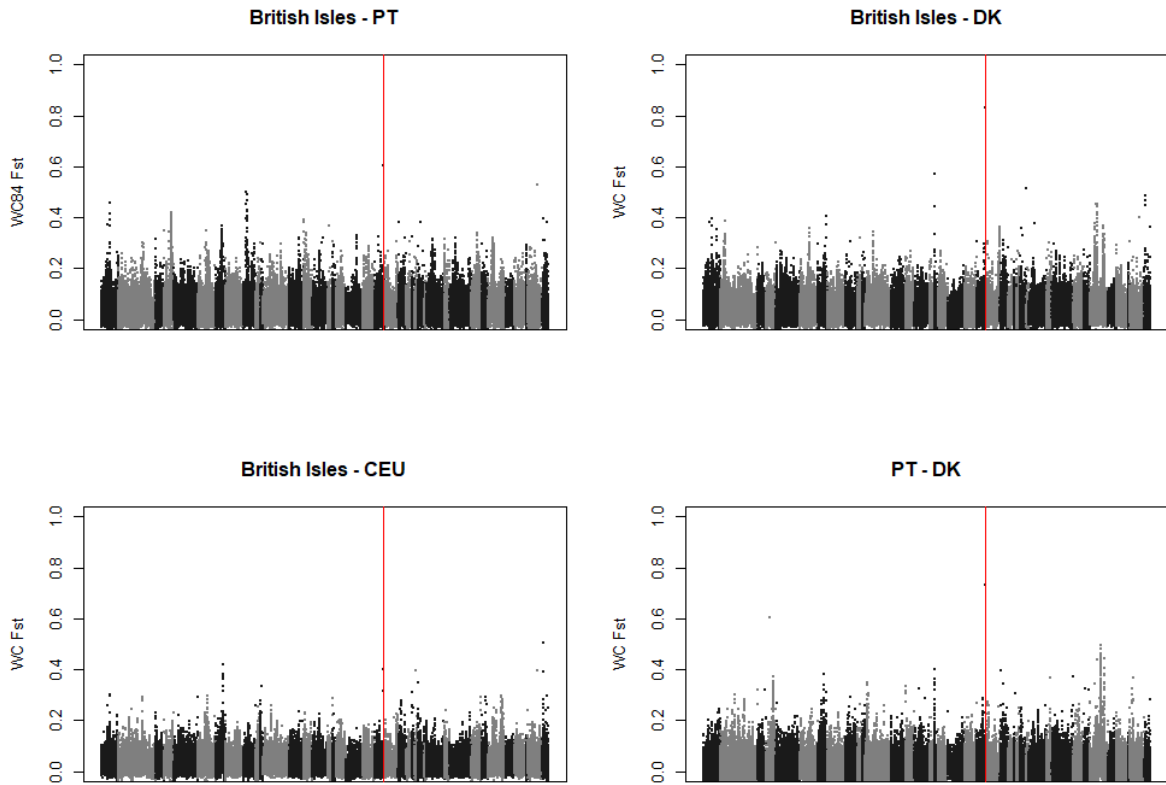

3

4 **Appendix 3 Figure 1** - Genome-wide  $F_{ST}$  scans. between differently coloured populations, averaged  
5 over 20 kbp sliding windows in 5 kbp step. Alternation in colours indicates change of scaffold.  
6 The red line shows the position of *MC1R* in the genome.

7

8 In addition to *MC1R*, we mapped 22 other autosomal genes (Appendix 3 Table 1) shown to be  
9 linked to melanin colouration in other organisms onto the barn owl genome. Our goal was to see  
10 if, in the absence of any signal at *MC1R*, any of these genes showed signals of particular  
11 differentiation between plumage colour morphs. The figures of the following pages are organised  
12 as follows: each page concerns one gene (or specific exons of a gene) indicated on the title of the  
13 left-hand side plots. Plots on the left show pairwise  $F_{ST}$  between pairs of populations indicated on  
14 the title, and on the right nucleotide diversity ( $\pi$ ), both estimated over 5kbp sliding windows in

15 1kbp step. Brit – British Isles, includes Great Britain and Ireland; PT – Portugal; DK – Denmark;  
16 CEU – Central Europe, includes France and Switzerland.

17

18 **Appendix 3 Table 1** – List of 23 candidate genes analysed in this study. The references indicated  
19 are examples of each gene’s link to melanin-based colouration.

| #  | Gene     | Reference                   |
|----|----------|-----------------------------|
| 1  | AGRP     | (Li et al. 2011)            |
| 2  | ASIP-ACD | (San-Jose et al. 2017)      |
| 3  | ATP6V1C2 | (Schweizer et al. 2016)     |
| 4  | CORIN    | (Bourgeois et al. 2016)     |
| 5  | CREB1    | (San-Jose et al. 2017)      |
| 6  | CTHRC1   | (Zheng et al. 2020)         |
| 7  | DCT      | (San-Jose et al. 2017)      |
| 8  | EDNRB2   | (Li et al. 2015)            |
| 9  | GPER1    | (Natale et al. 2016)        |
| 10 | GPR143   | (Shi et al. 2012)           |
| 11 | GR       | (Béziers et al. 2019)       |
| 12 | KIT      | (San-Jose et al. 2017)      |
| 13 | MC1R     | (San-Jose et al. 2017)      |
| 14 | MFSD12   | (Aguillon et al. 2021)      |
| 15 | MGRN1    | (Walker and Gunn 2010)      |
| 16 | MITF-M   | (Li et al. 2012)            |
| 17 | MR       | (Béziers et al. 2019)       |
| 18 | OCA2     | (Kratochwil et al. 2019)    |
| 19 | PCSK2    | (San-Jose et al. 2017)      |
| 20 | POMC     | (Li et al. 2011)            |
| 21 | RAB38    | (Abolins-Abols et al. 2018) |
| 22 | SOX10    | (Li et al. 2011)            |
| 23 | TYR      | (San-Jose et al. 2017)      |

20

**DCT : Brit – PT**

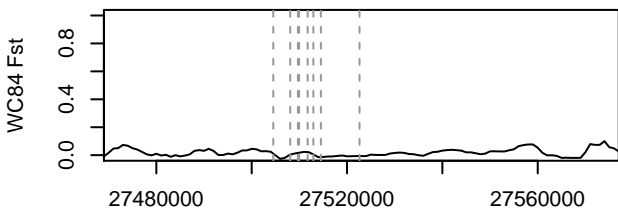

**British Isles**

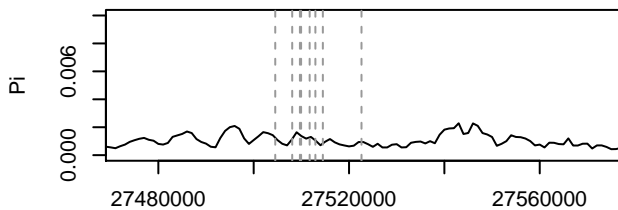

**DCT : Brit – DK**

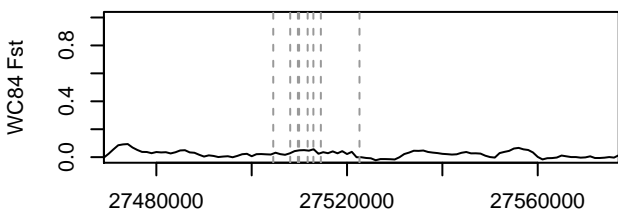

**Denmark**

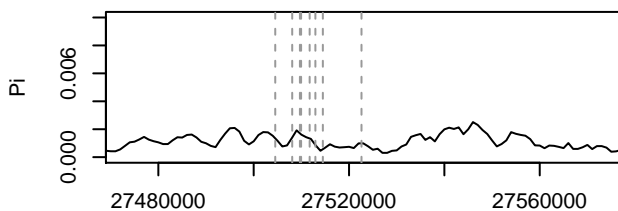

**DCT : Brit – CEU**

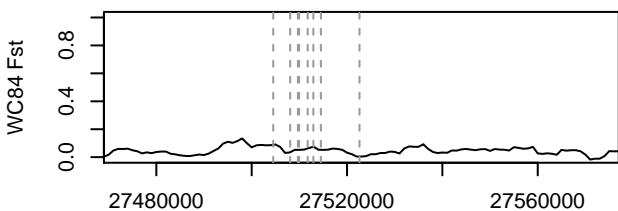

**C Europe**

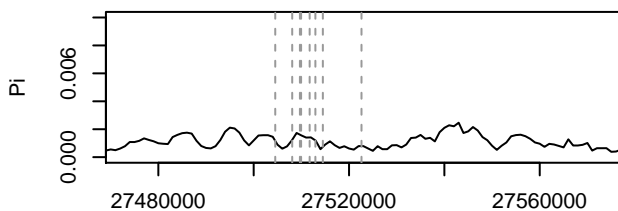

**DCT : PT – DK**

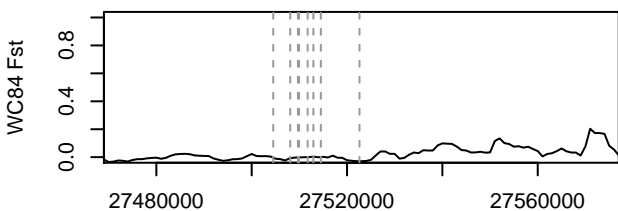

**Portugal**

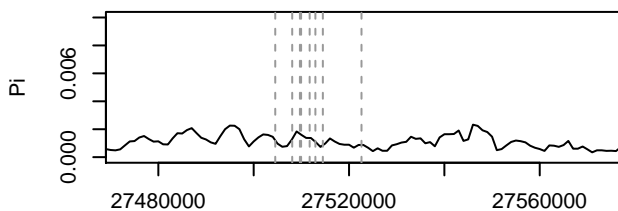

**KIT : Brit – PT**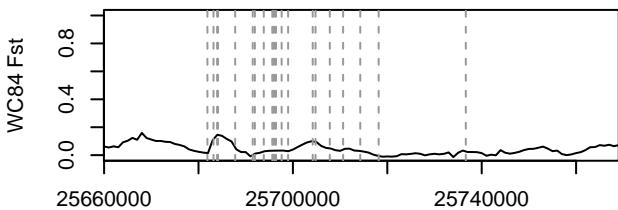**British Isles**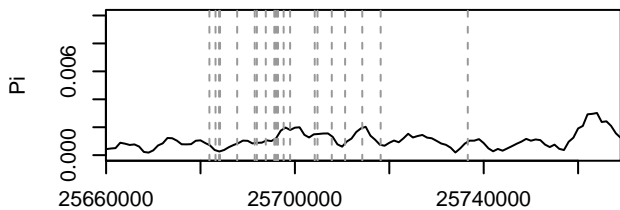**KIT : Brit – DK**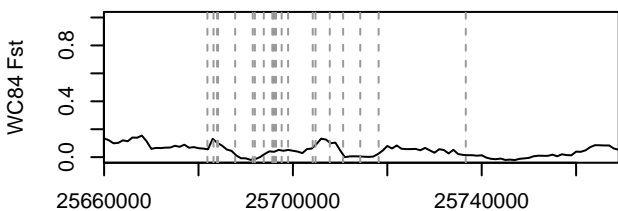**Denmark**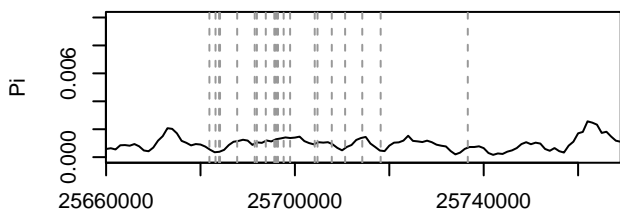**KIT : Brit – CEU**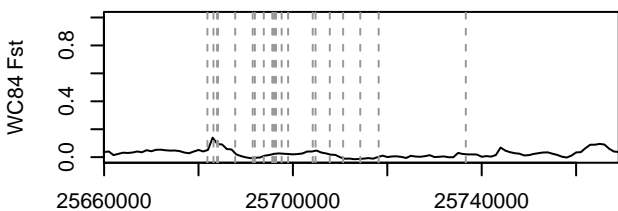**C Europe**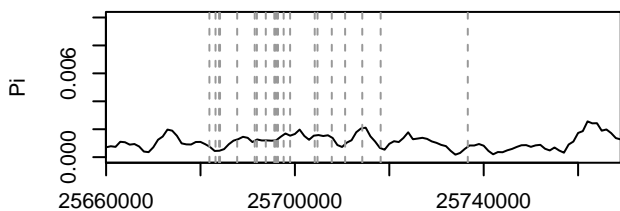**KIT : PT – DK**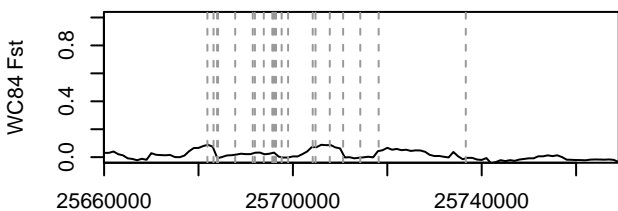**Portugal**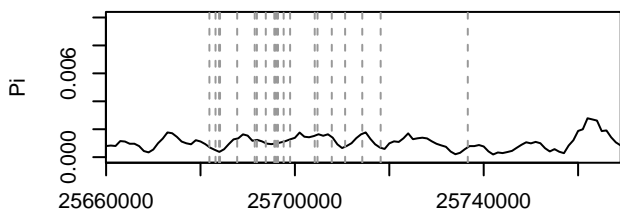

**MITF-M : Brit - PT**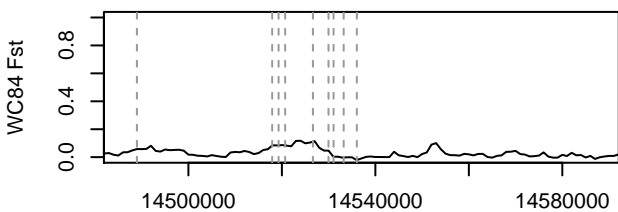**British Isles**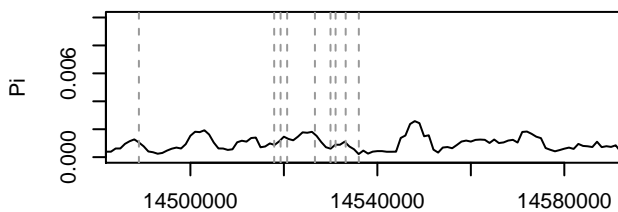**MITF-M : Brit - DK**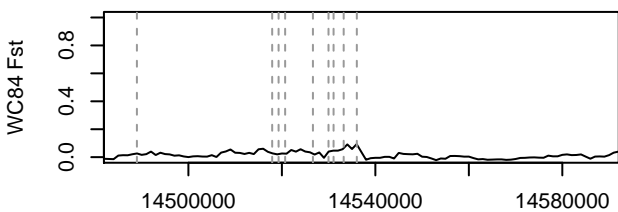**Denmark**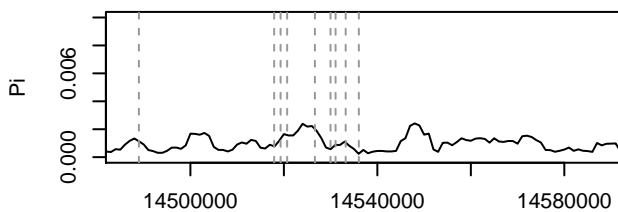**MITF-M : Brit - CEU**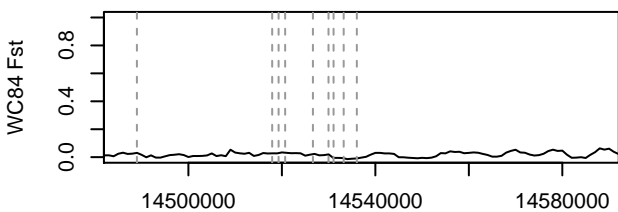**C Europe**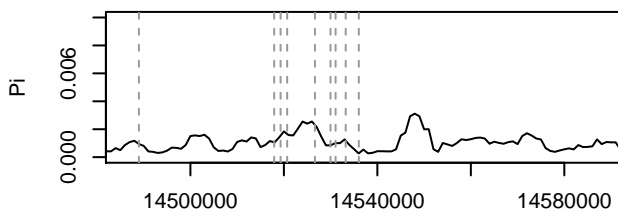**MITF-M : PT - DK**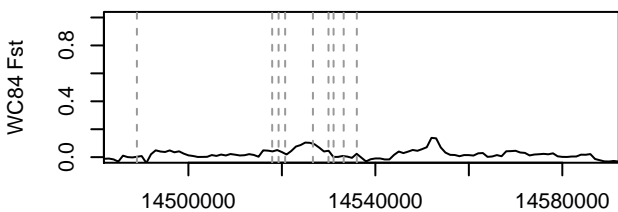**Portugal**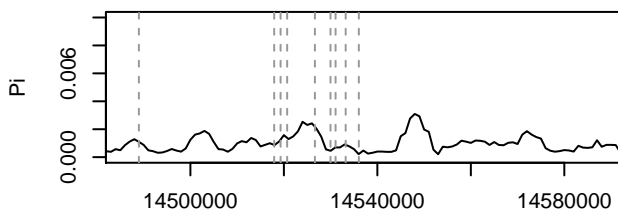

**OCA2 : Brit – PT**

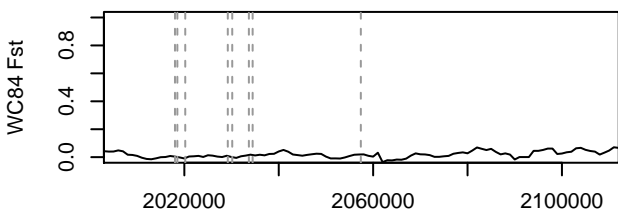

**British Isles**

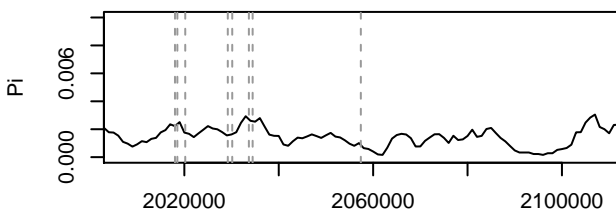

**OCA2 : Brit – DK**

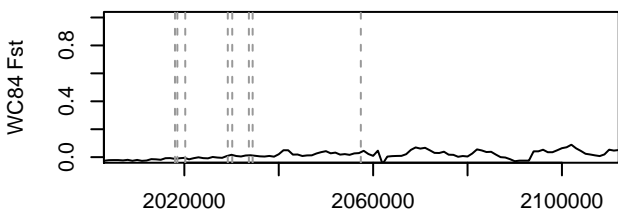

**Denmark**

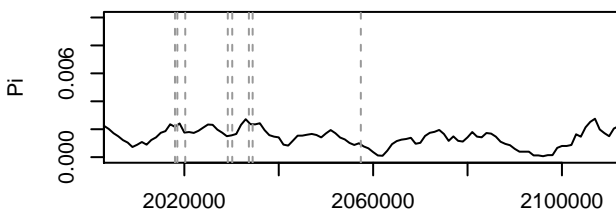

**OCA2 : Brit – CEU**

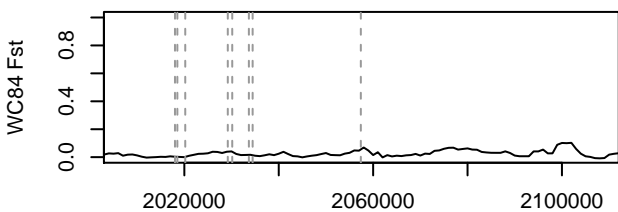

**C Europe**

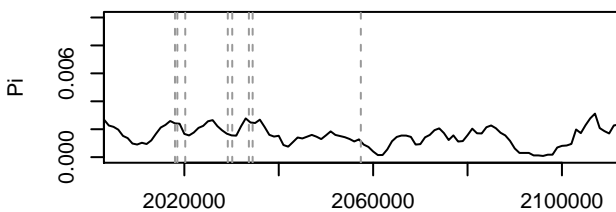

**OCA2 : PT – DK**

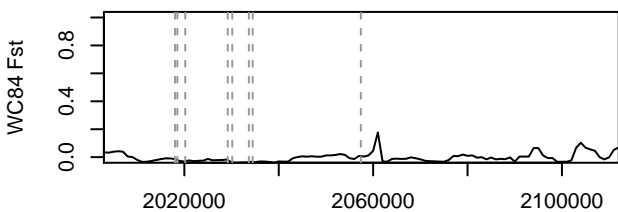

**Portugal**

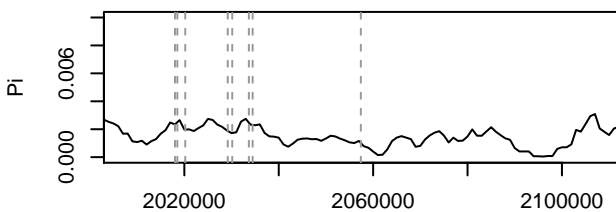

**TYR : Brit – PT**

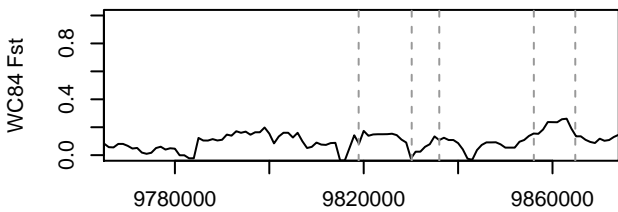

**British Isles**

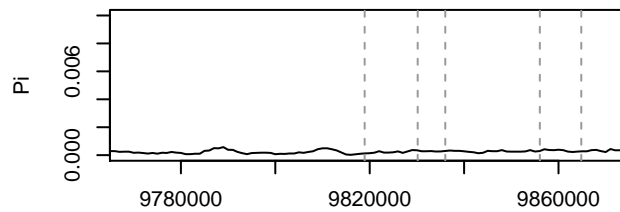

**TYR : Brit – DK**

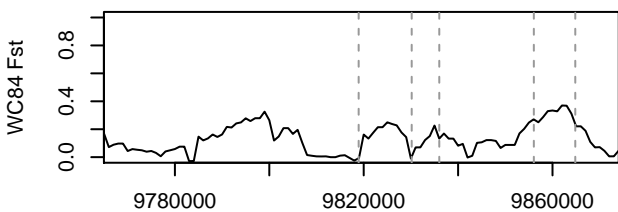

**Denmark**

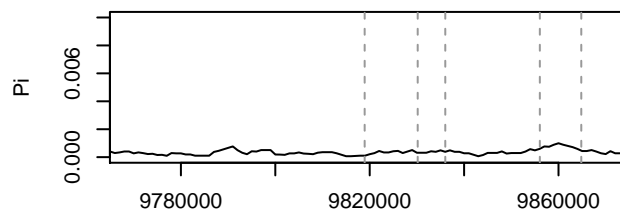

**TYR : Brit – CEU**

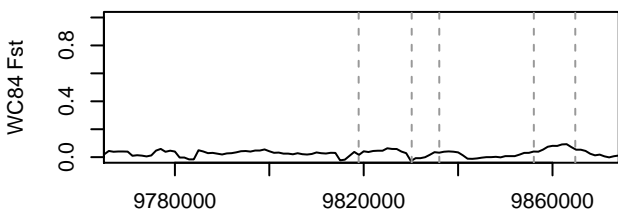

**C Europe**

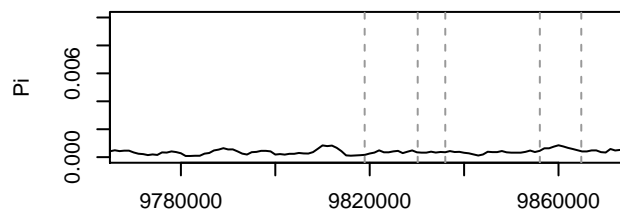

**TYR : PT – DK**

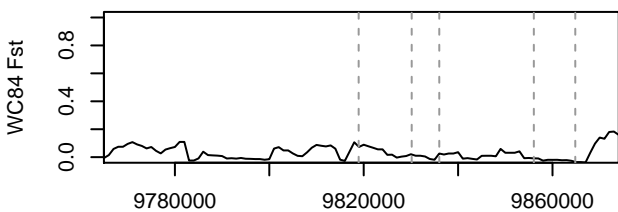

**Portugal**

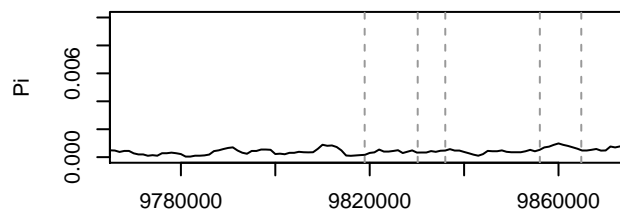

**CREB1 : Brit - PT**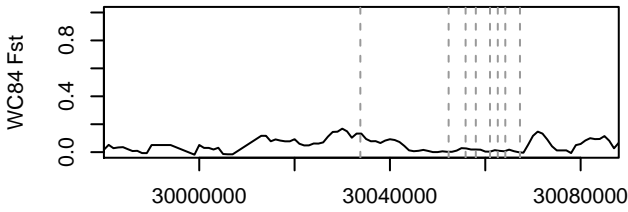**British Isles**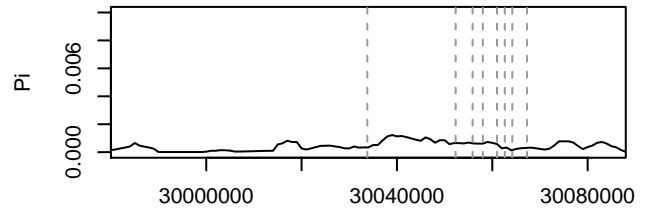**CREB1 : Brit - DK**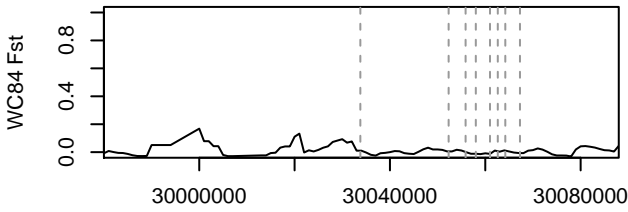**Denmark**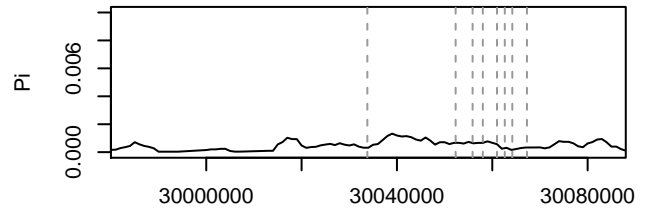**CREB1 : Brit - CEU**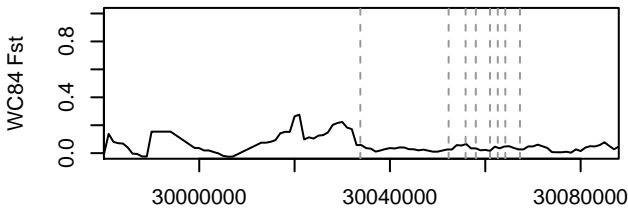**C Europe**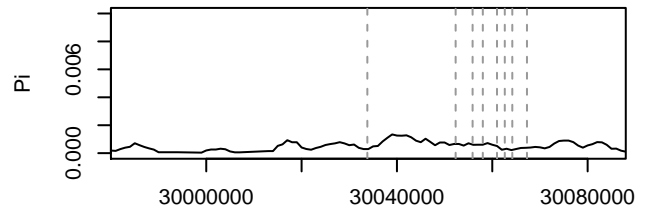**CREB1 : PT - DK**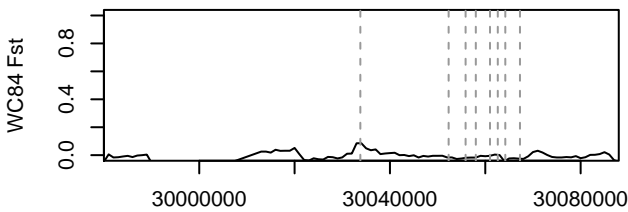**Portugal**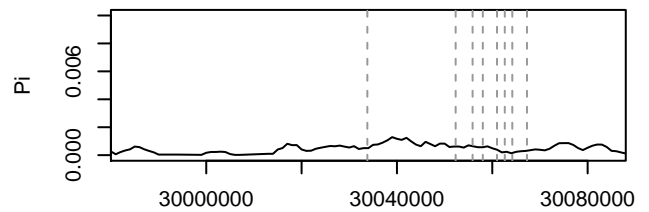



**PCSK2 : Brit – PT**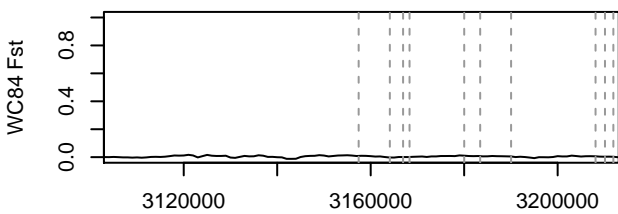**British Isles**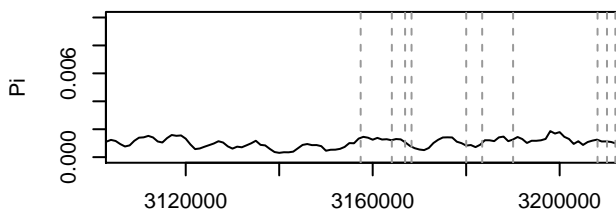**PCSK2 : Brit – DK**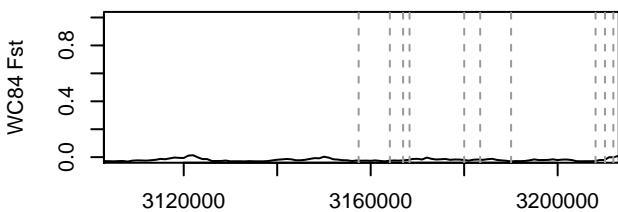**Denmark**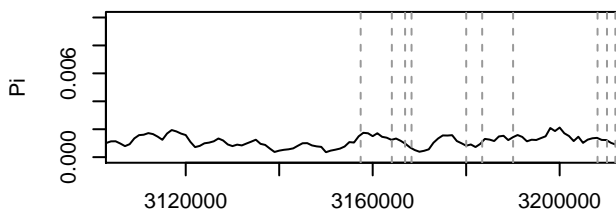**PCSK2 : Brit – CEU**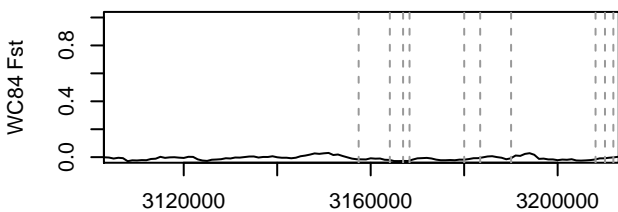**C Europe**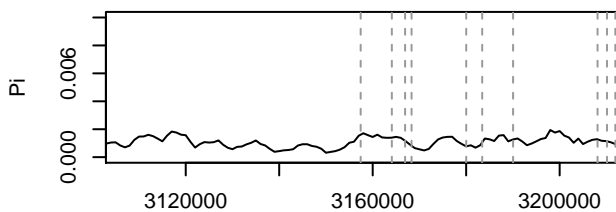**PCSK2 : PT – DK**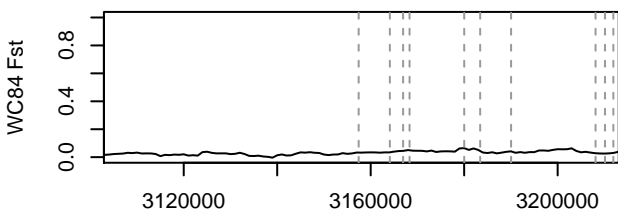**Portugal**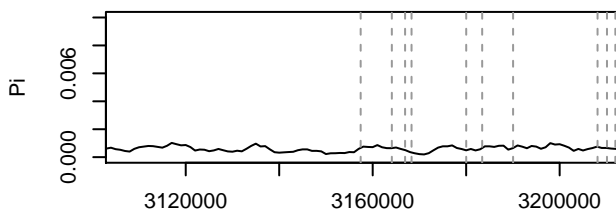

**ASIP-ACD : Brit - PT**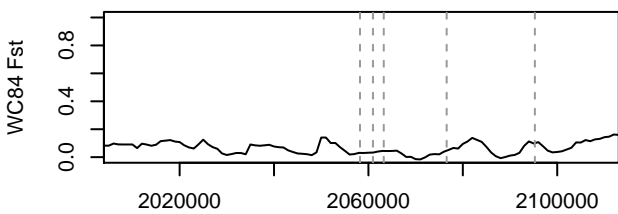**British Isles**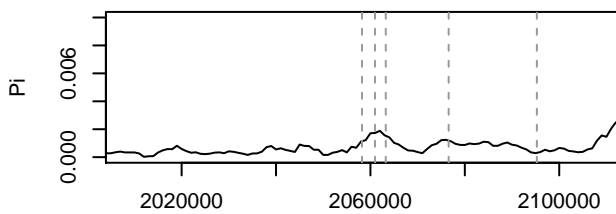**ASIP-ACD : Brit - DK**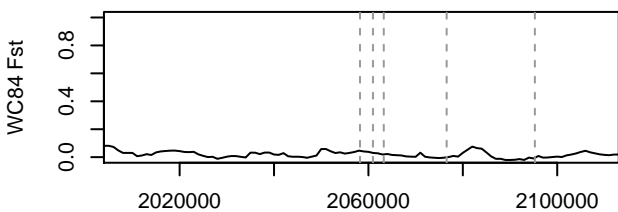**Denmark**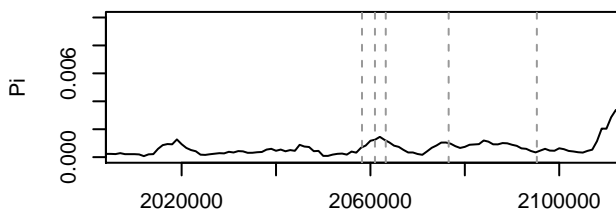**ASIP-ACD : Brit - CEU**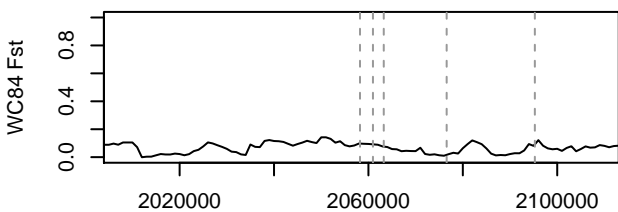**C Europe**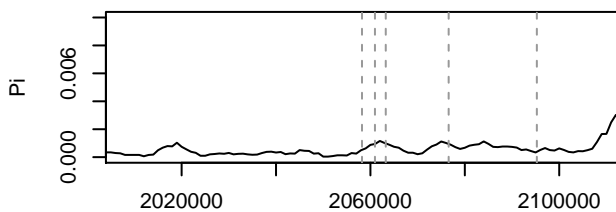**ASIP-ACD : PT - DK**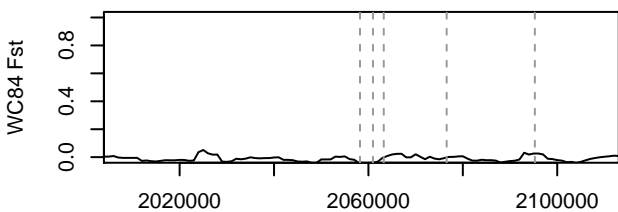**Portugal**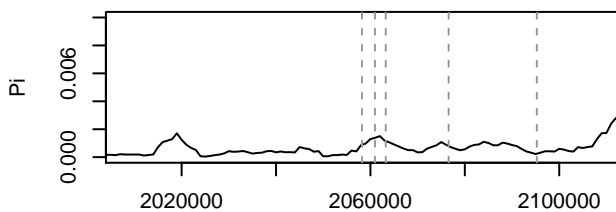

**GR : Brit – PT**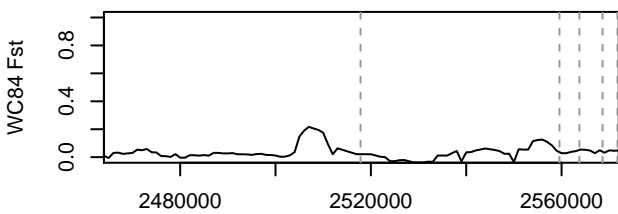**British Isles**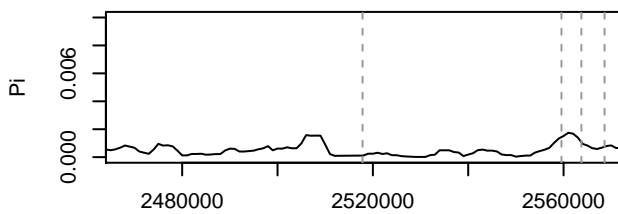**GR : Brit – DK**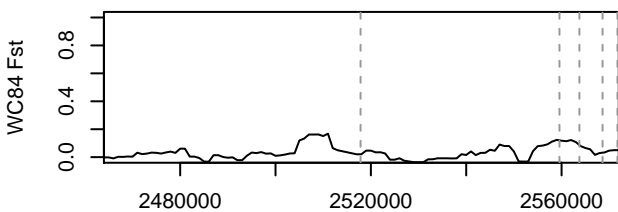**Denmark**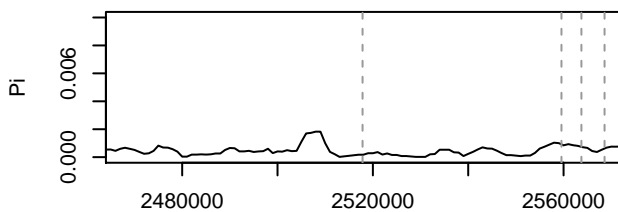**GR : Brit – CEU**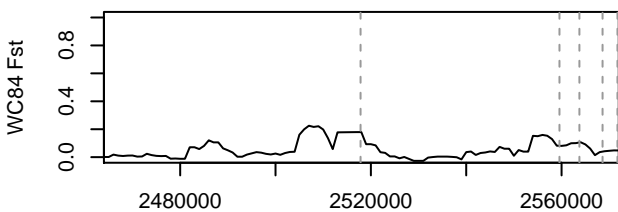**C Europe**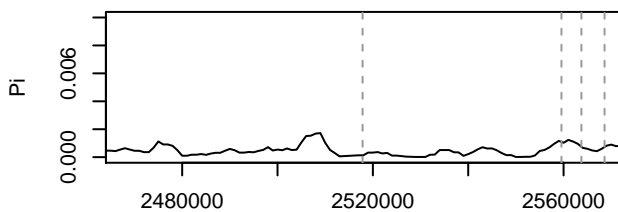**GR : PT – DK**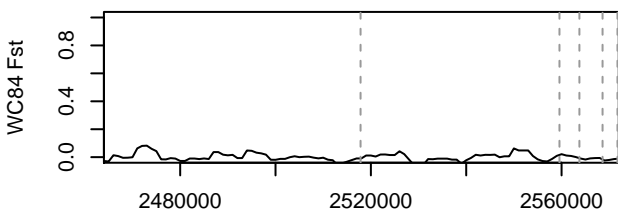**Portugal**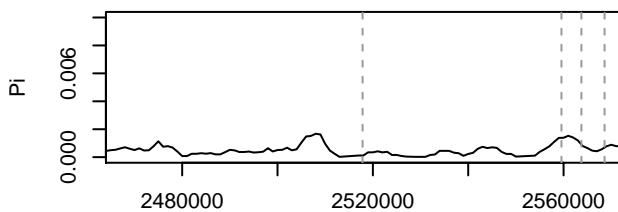

**MR : Brit – PT**

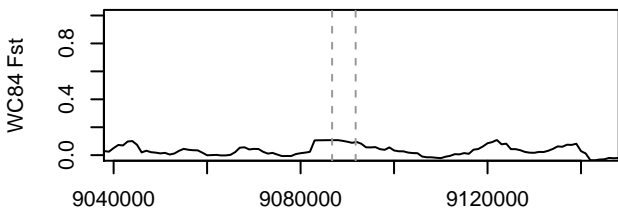

**British Isles**

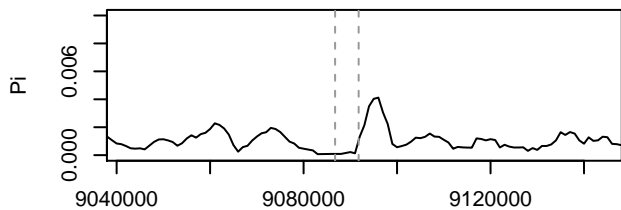

**MR : Brit – DK**

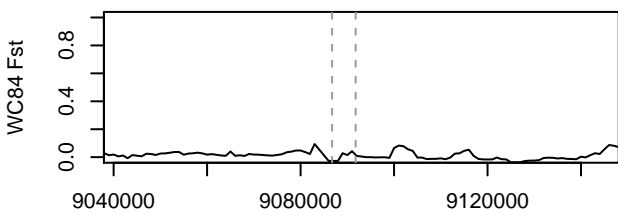

**Denmark**

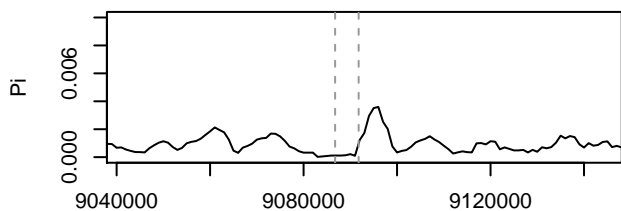

**MR : Brit – CEU**

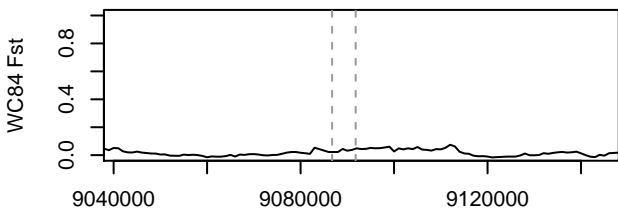

**C Europe**

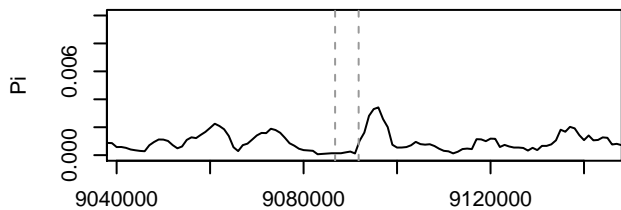

**MR : PT – DK**

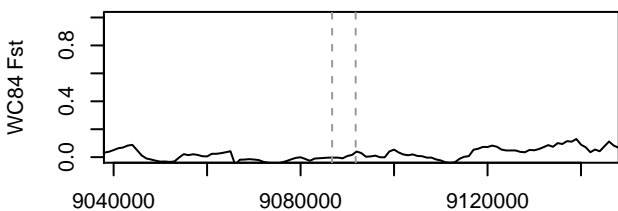

**Portugal**

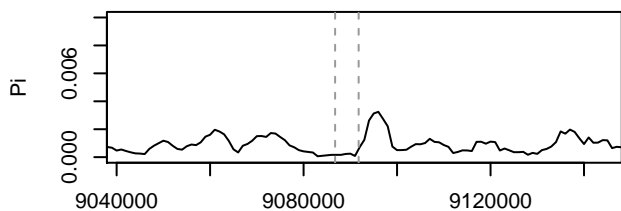

**POMC : Brit – PT**

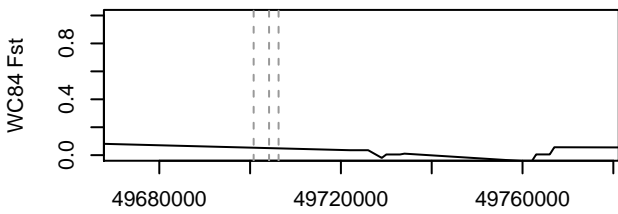

**British Isles**

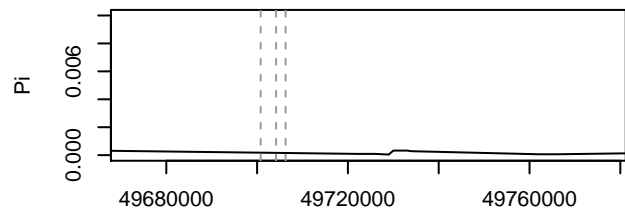

**POMC : Brit – DK**

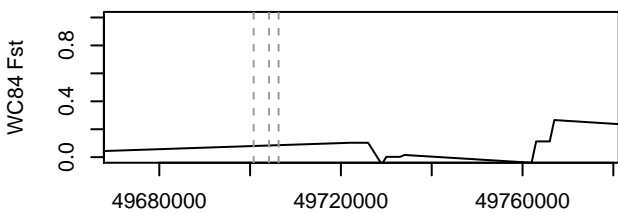

**Denmark**

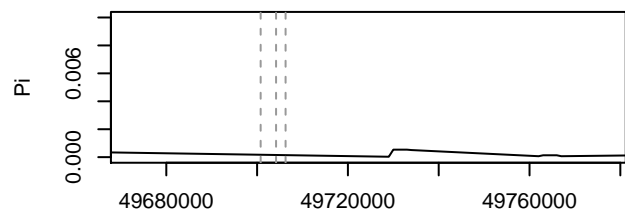

**POMC : Brit – CEU**

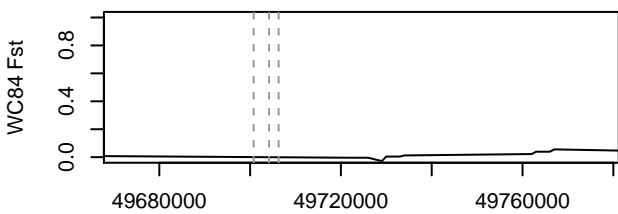

**C Europe**

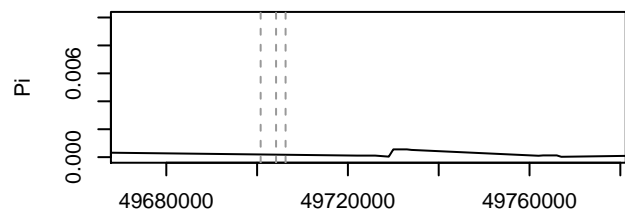

**POMC : PT – DK**

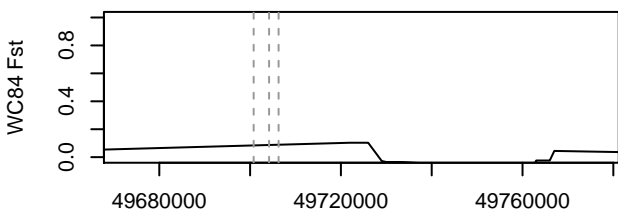

**Portugal**

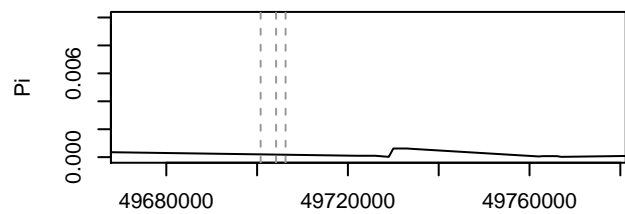

**AGRP : Brit – PT**

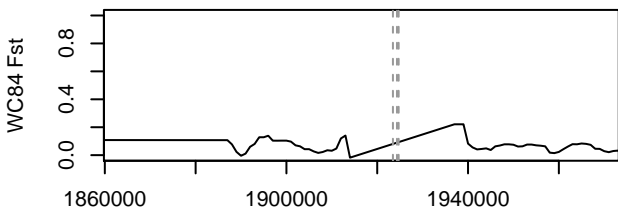

**British Isles**

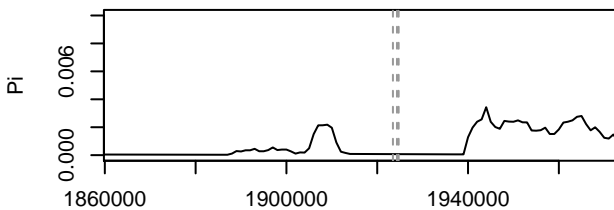

**AGRP : Brit – DK**

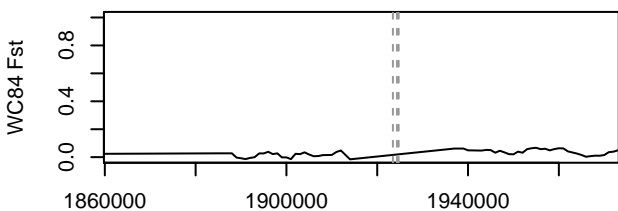

**Denmark**

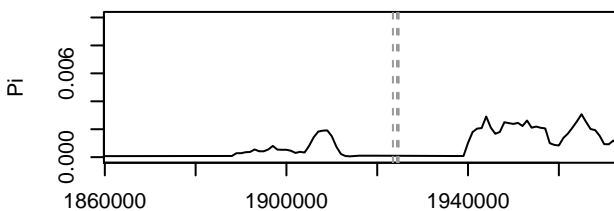

**AGRP : Brit – CEU**

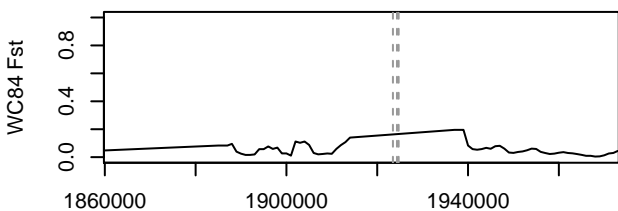

**C Europe**

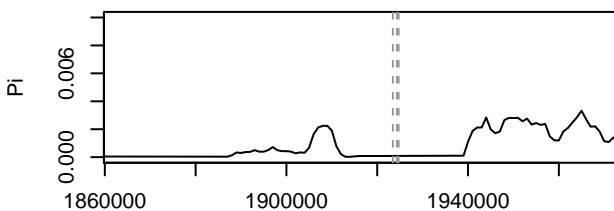

**AGRP : PT – DK**

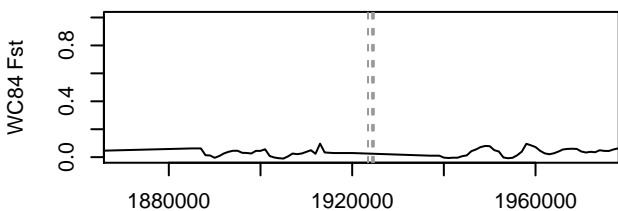

**Portugal**

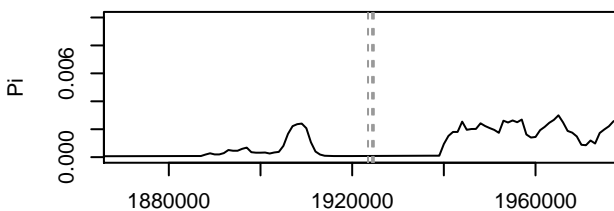

**MC1R : Brit – PT**

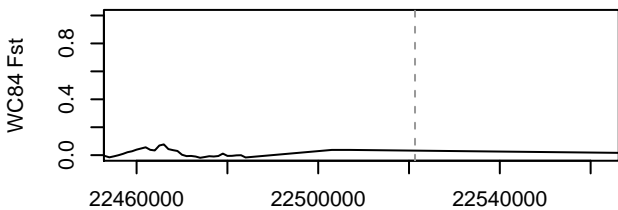

**British Isles**

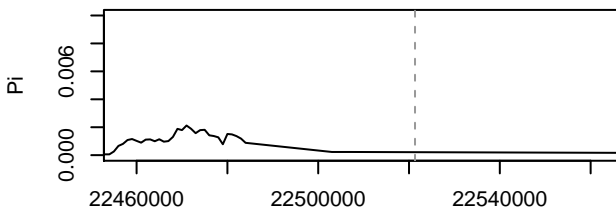

**MC1R : Brit – DK**

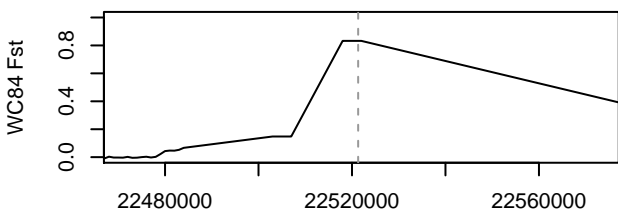

**Denmark**

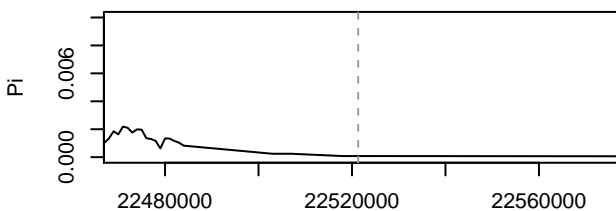

**MC1R : Brit – CEU**

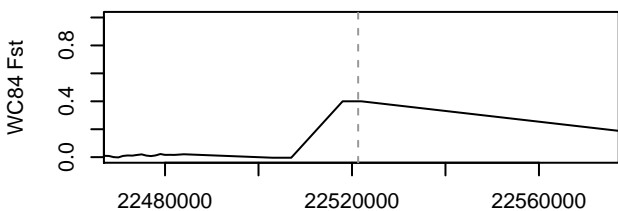

**C Europe**

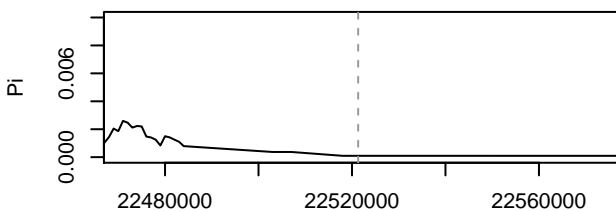

**MC1R : PT – DK**

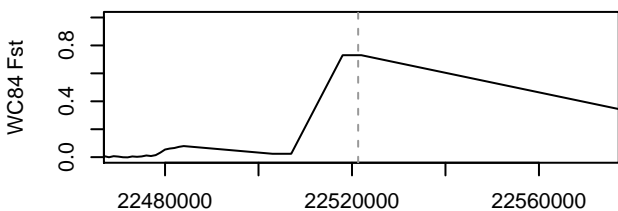

**Portugal**

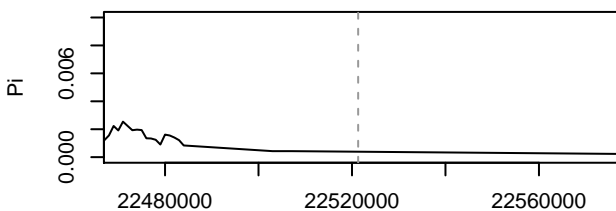

**SOX10 : Brit - PT**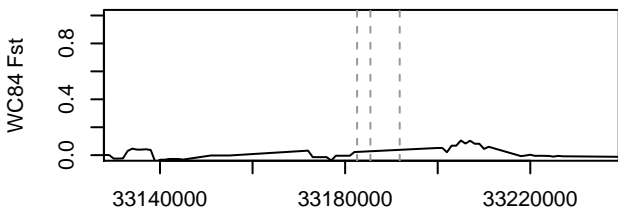**British Isles**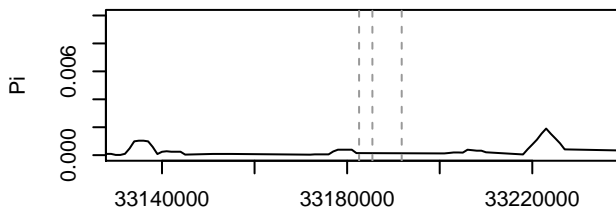**SOX10 : Brit - DK**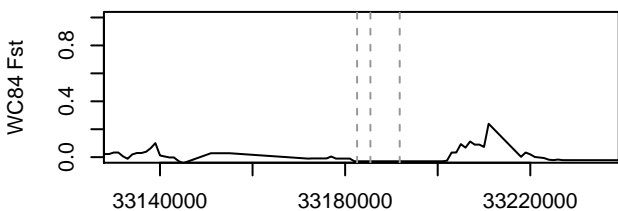**Denmark**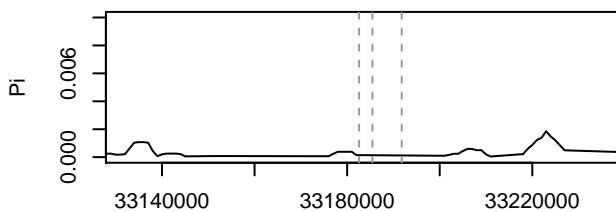**SOX10 : Brit - CEU**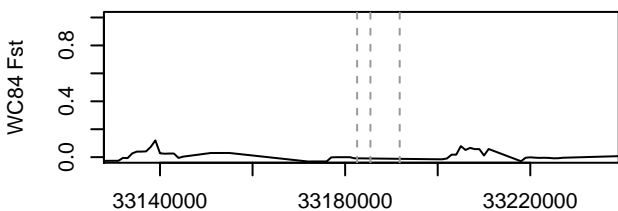**C Europe**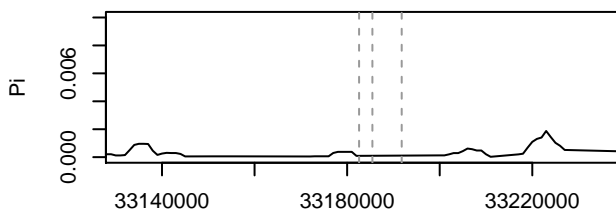**SOX10 : PT - DK**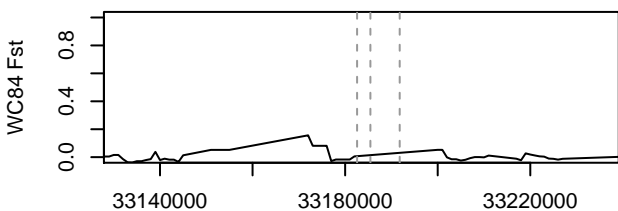**Portugal**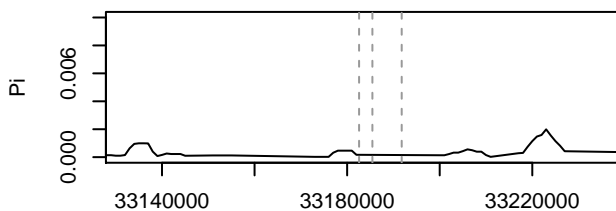



**CORIN : Brit - PT**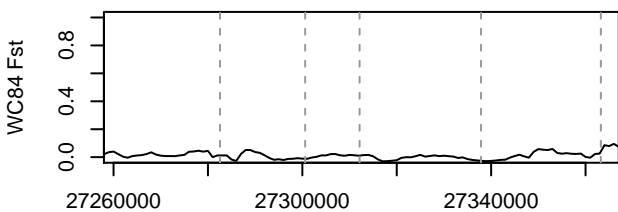**British Isles**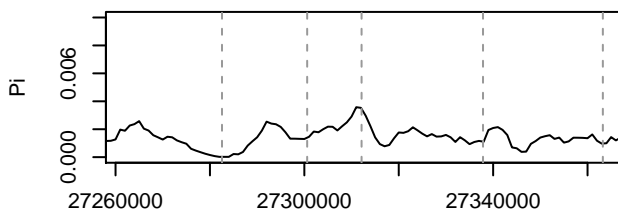**CORIN : Brit - DK**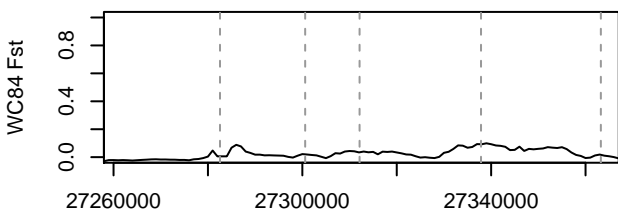**Denmark**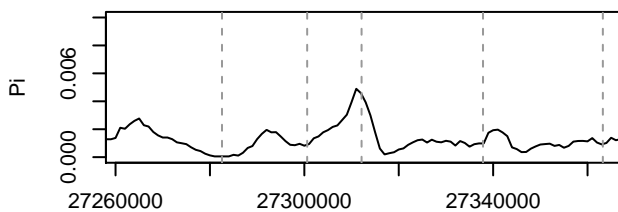**CORIN : Brit - CEU**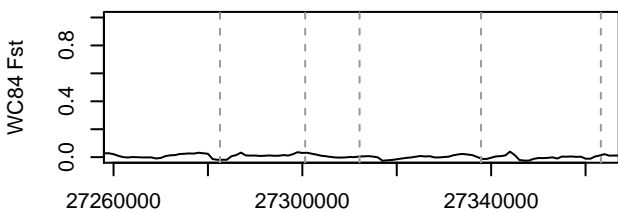**C Europe**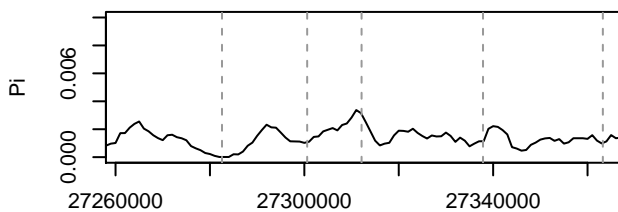**CORIN : PT - DK**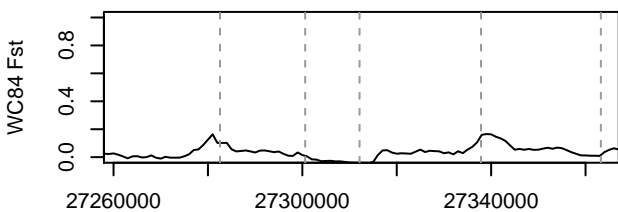**Portugal**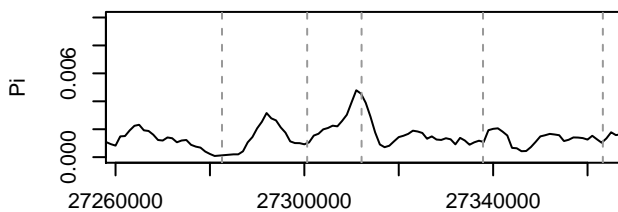

**CTHRC1 : Brit – PT**

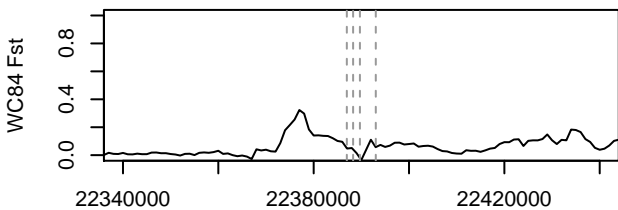

**British Isles**

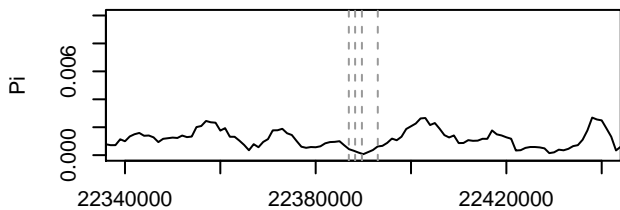

**CTHRC1 : Brit – DK**

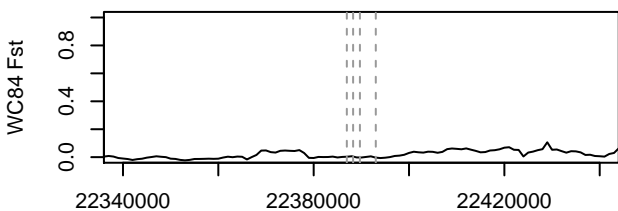

**Denmark**

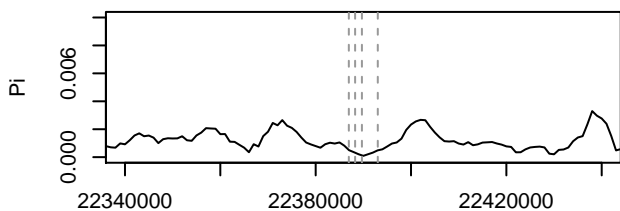

**CTHRC1 : Brit – CEU**

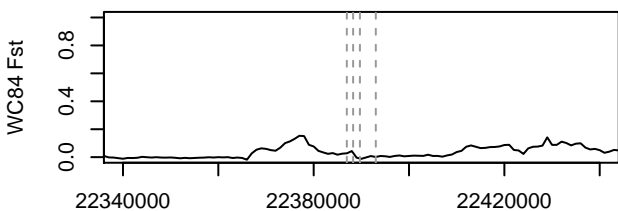

**C Europe**

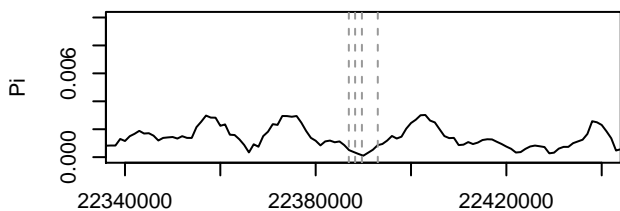

**CTHRC1 : PT – DK**

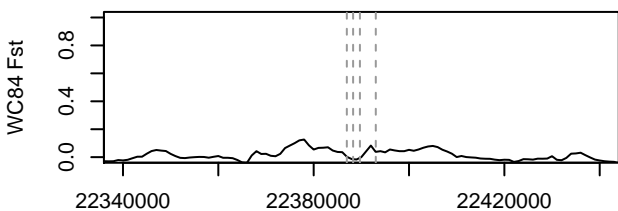

**Portugal**

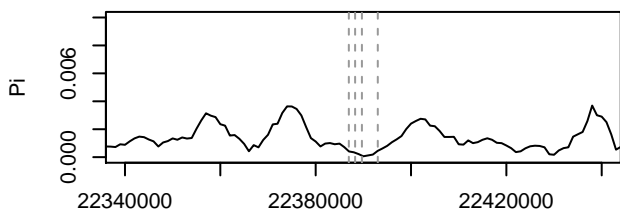

**ATP6V1C2 : Brit – PT**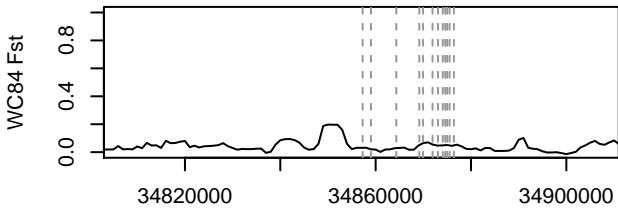**British Isles**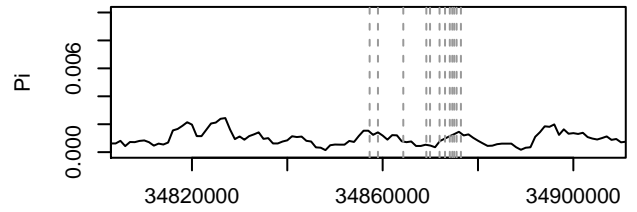**ATP6V1C2 : Brit – DK**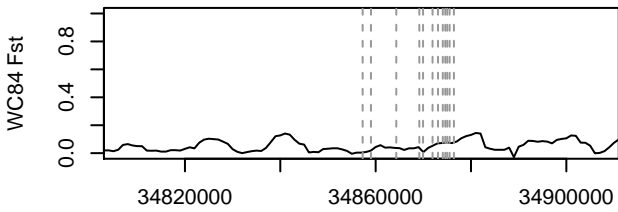**Denmark**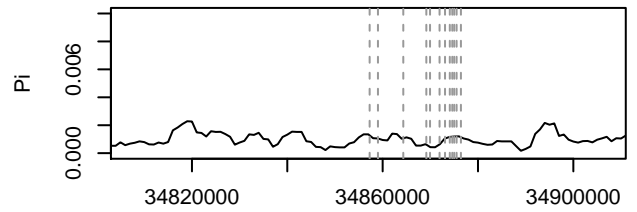**ATP6V1C2 : Brit – CEU**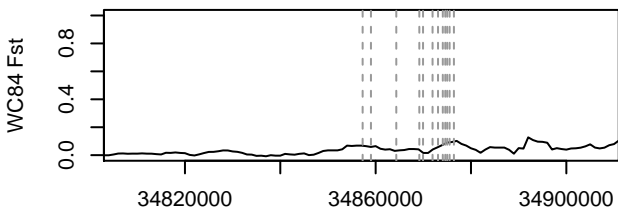**C Europe**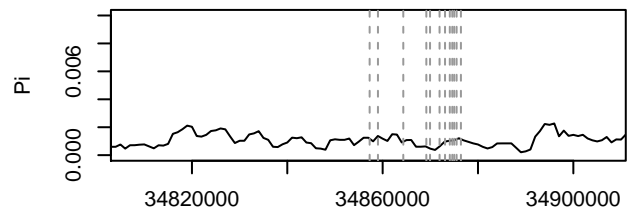**ATP6V1C2 : PT – DK**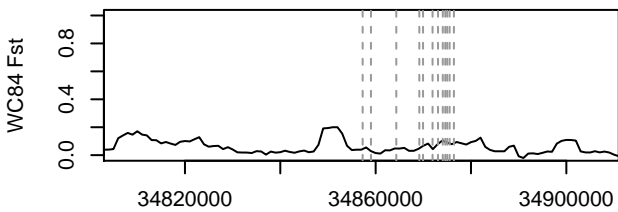**Portugal**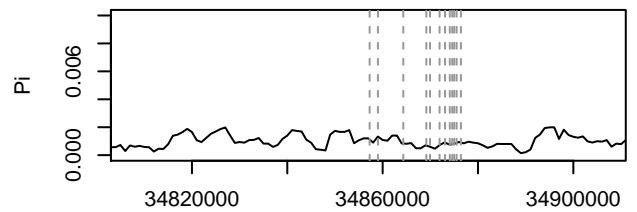

**EDNRB2 : Brit – PT**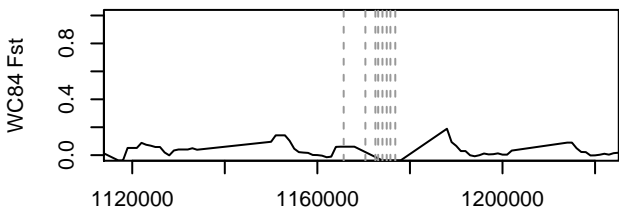**British Isles**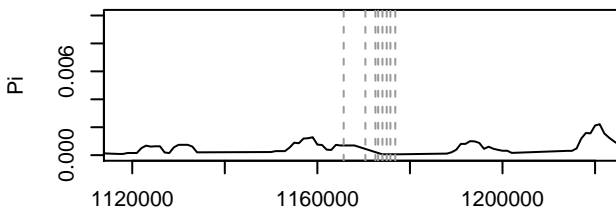**EDNRB2 : Brit – DK**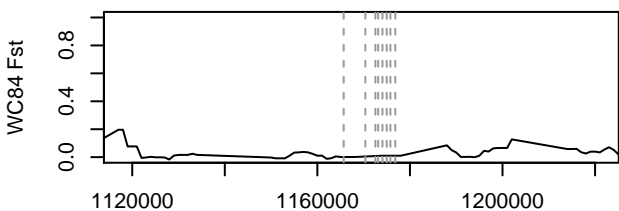**Denmark**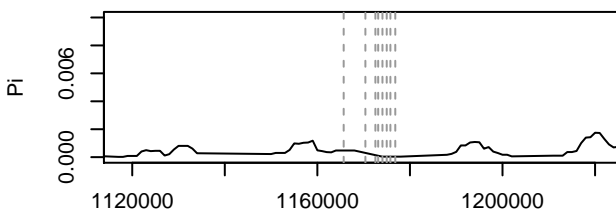**EDNRB2 : Brit – CEU**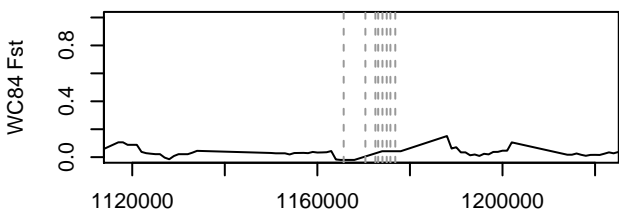**C Europe**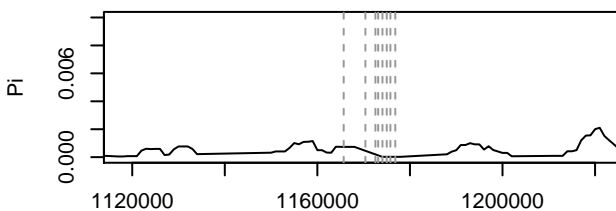**EDNRB2 : PT – DK**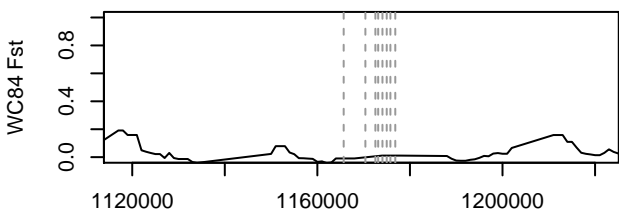**Portugal**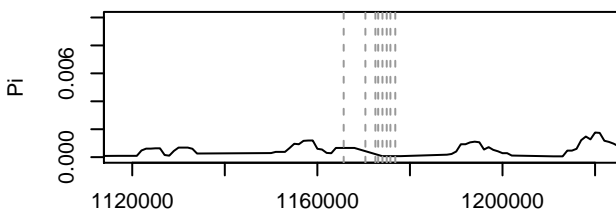

**GPER1 : Brit - PT**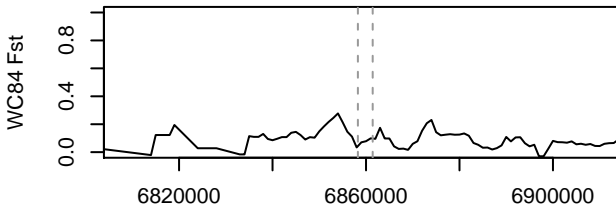**British Isles**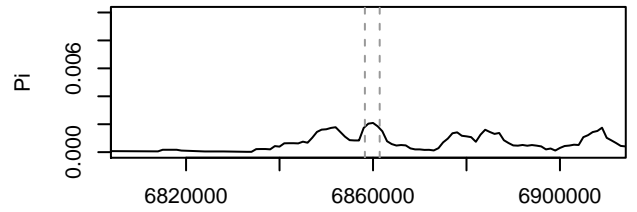**GPER1 : Brit - DK**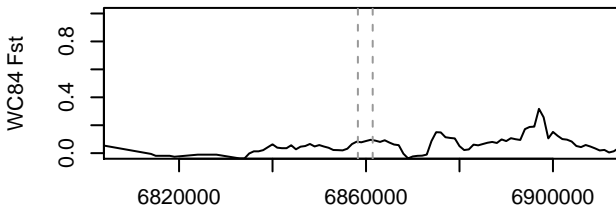**Denmark**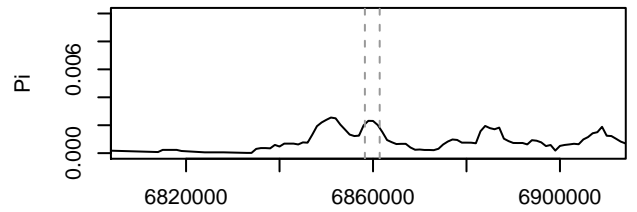**GPER1 : Brit - CEU**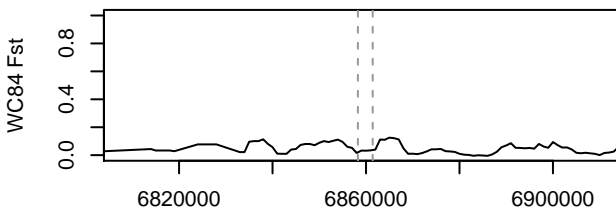**C Europe**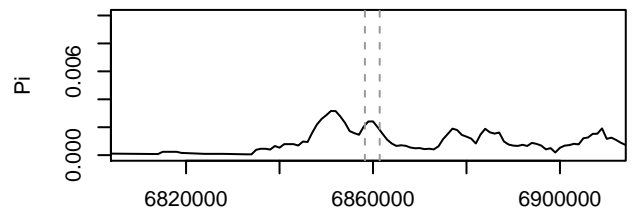**GPER1 : PT - DK**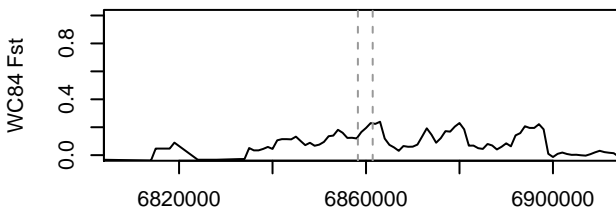**Portugal**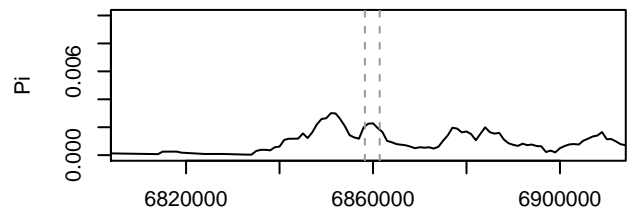

**GPR143 : Brit – PT**

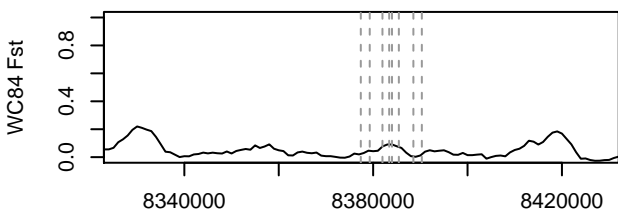

**British Isles**

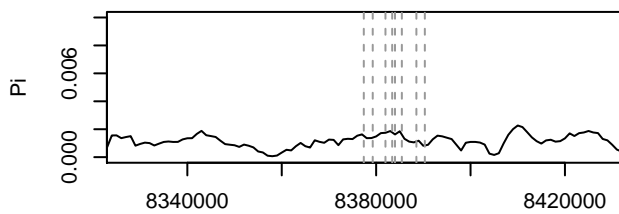

**GPR143 : Brit – DK**

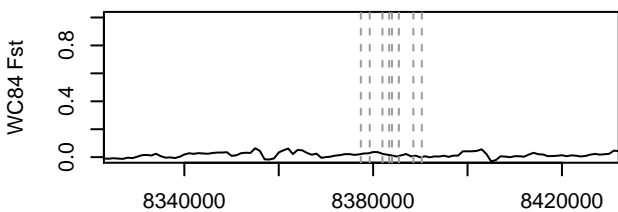

**Denmark**

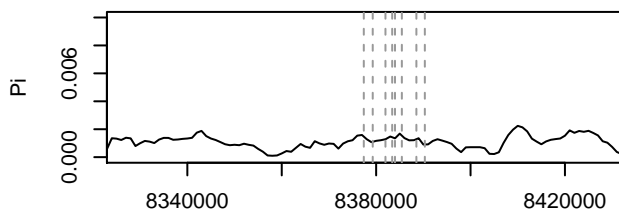

**GPR143 : Brit – CEU**

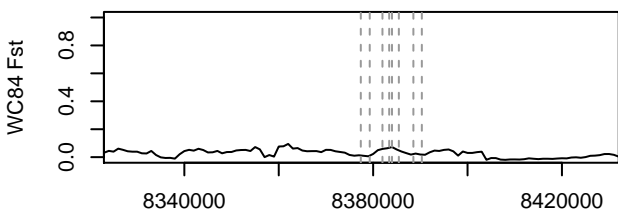

**C Europe**

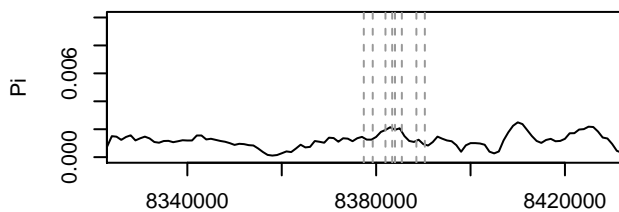

**GPR143 : PT – DK**

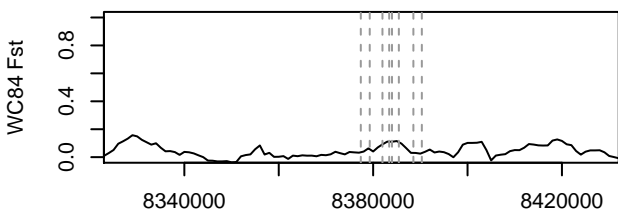

**Portugal**

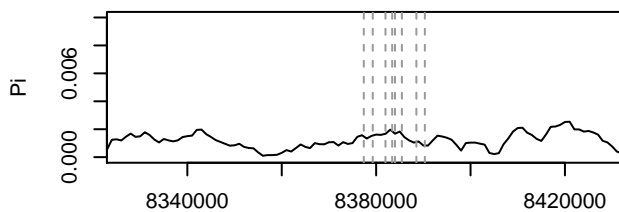

**MFSD12 : Brit – PT**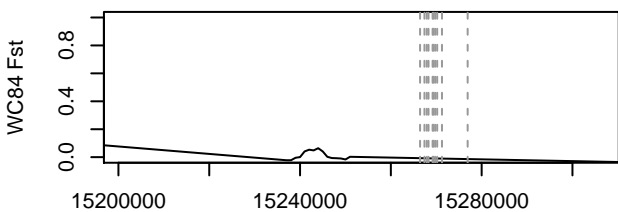**British Isles**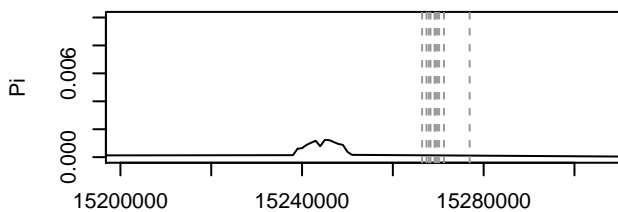**MFSD12 : Brit – DK**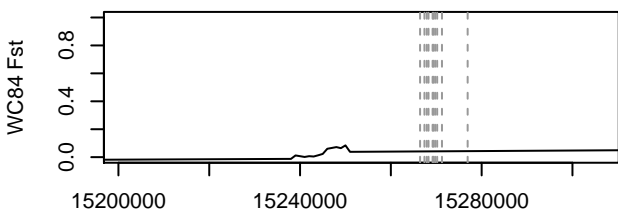**Denmark**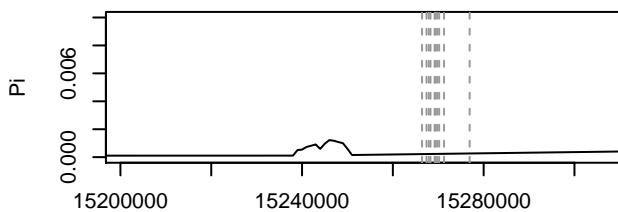**MFSD12 : Brit – CEU**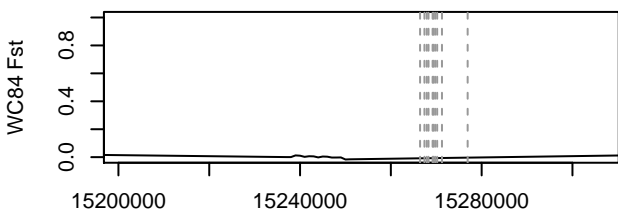**C Europe**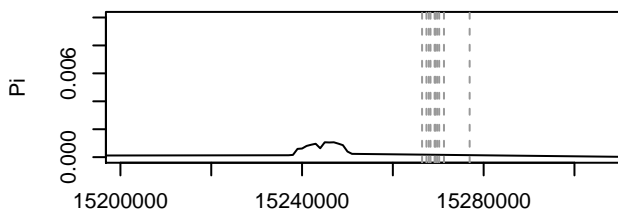**MFSD12 : PT – DK**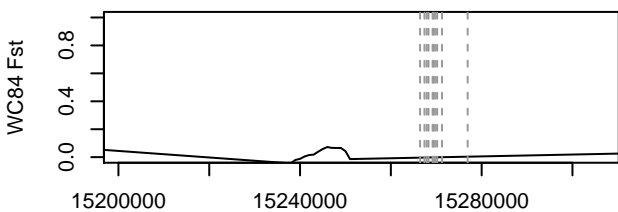**Portugal**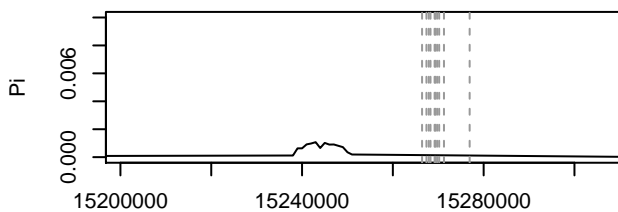

**MGRN1 : Brit – PT**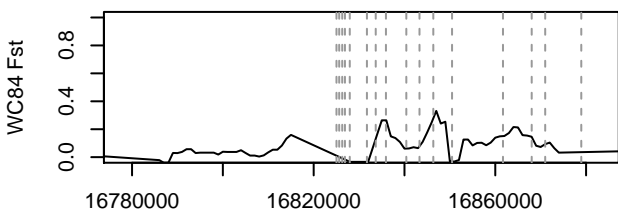**British Isles**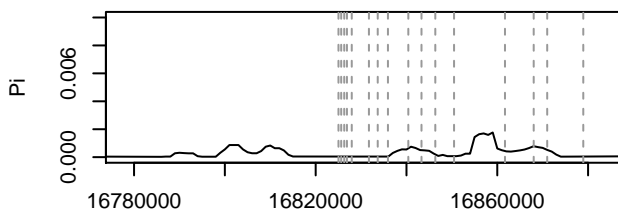**MGRN1 : Brit – DK**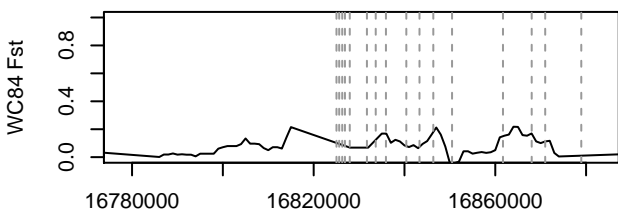**Denmark**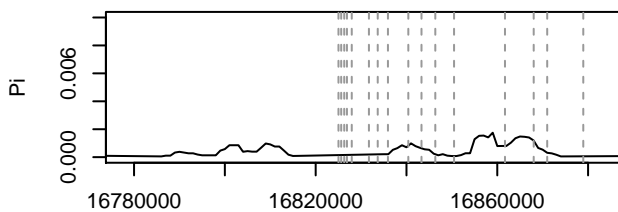**MGRN1 : Brit – CEU**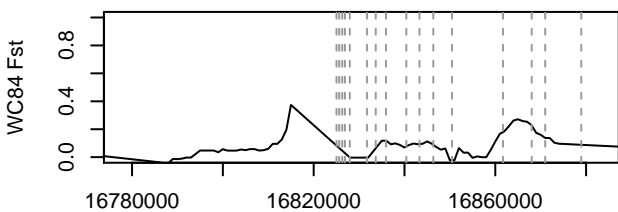**C Europe**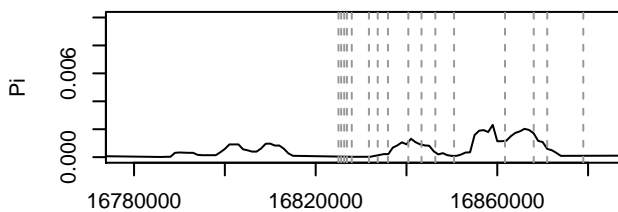**MGRN1 : PT – DK**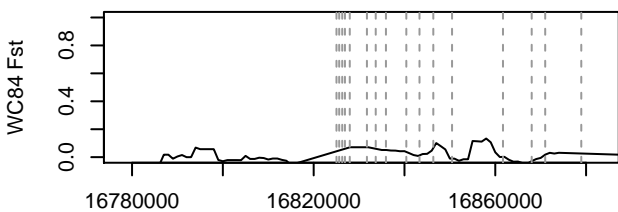**Portugal**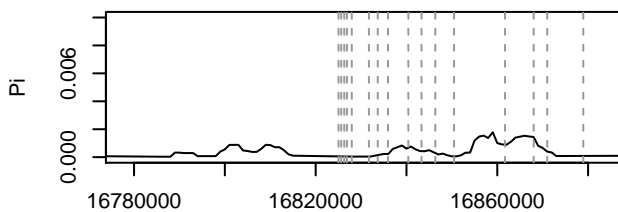



**RAB38 : Brit – PT**

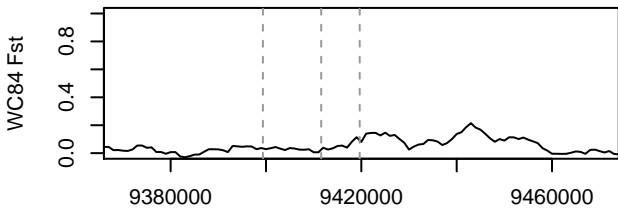

**British Isles**

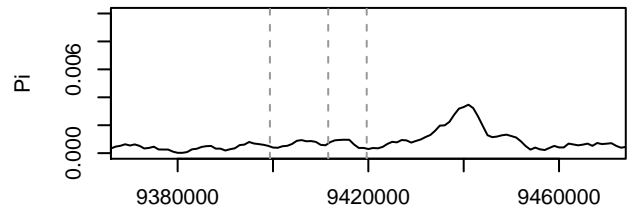

**RAB38 : Brit – DK**

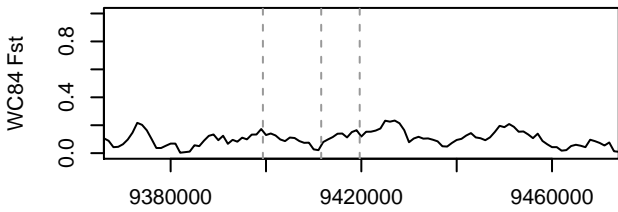

**Denmark**

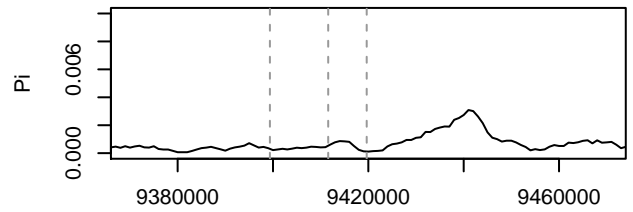

**RAB38 : Brit – CEU**

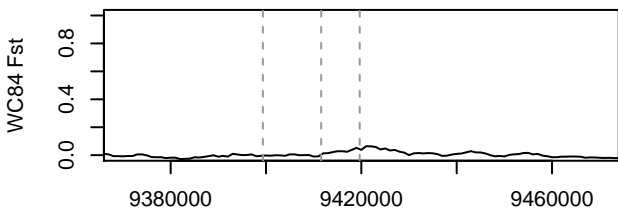

**C Europe**

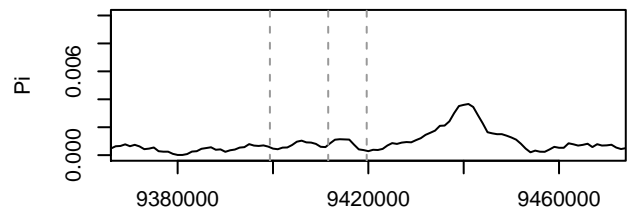

**RAB38 : PT – DK**

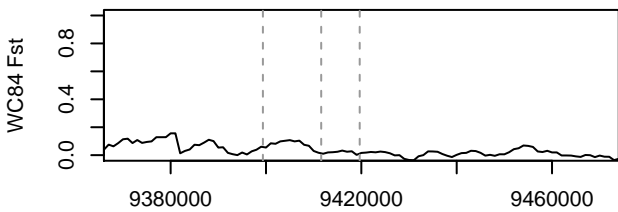

**Portugal**

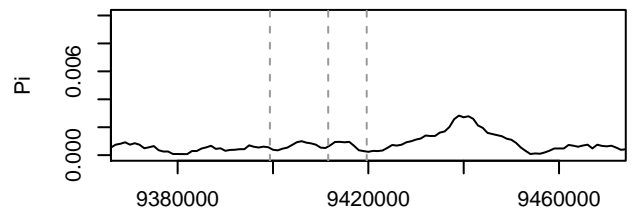

Supplement: Supplementary file [file media-4.pdf]
