# Supplementary material for: Unexpected post-glacial colonisation route explains the white colour of barn owls (Tyto alba) from the British Isles
Source: bioRxiv or medRxiv preprint supplement (doi:10.1101/2021.04.23.441058), 2021-04-23
Supplement: Supplementary file [file media-3.pdf]

## 1 APPENDIX 2 – New reference genome of European barn owl (*Tyto alba*)

2

### 3 *Extraction of high molecular weight genomic DNA*

4 A fresh blood sample was collected from a young Swiss male barn owl (M040663). High  
5 molecular weight (HMW) genomic DNA was extracted using an agarose plug method as described  
6 by Zhang et al. (2012). In brief, red cells were counted. For 10 µg of DNA-agarose plug of 100 µl,  
7 10 µl of red cells washed in PBS and resuspended in 190 µl of PBS were added to 200 µl of 1%  
8 (wt/vol) low melt agarose (Low gelling temperature agarose, Life Technologies) at 45 °C. 100 µl of  
9 the mix was applied to the disposable plug molds (Bio-Rad). The plugs were transferred to falcon  
10 tubes and cells digested with 0.5M EDTA pH 9.3, 1 % (wt/vol) sodium lauryl sarcosine and 0.3  
11 mg/ml of proteinase K (Promega) for 24h at 50 °C with slow shaking 40 rpm. The plugs were then  
12 washed once in 50 mM EDTA pH 8.0, then 3x in 10 mM Tris-HCl pH 8.0, 1 mM EDTA (TE 1x) with  
13 0.1 mM PMSF, 3x TE 1x buffer, each wash for 1 hour on ice. Then following the Bionano protocol  
14 (bionano Genomics), each plug was transferred to 1.5 ml eppendorf tube, excess of liquid was  
15 wiped out, the plug was quickly spin down and place at 65 °C for 10 min, then transferred to  
16 42 °C for 5 min. One µl of 1 U/µl of beta-agarase (Bioconcept) was added and the tube incubated  
17 for 45 min at 42 °C. The DNA was then dialysed on a nitrocellulose 0.1 µm millipore membrane  
18 (Merck) for 45 min in TE 1x buffer. Viscous HMW DNA was recovered in a 1.5 ml eppendorf tube  
19 and kept at 4 °C. After 24h, the DNA was homogenized by pipetting up down with wide-bore tips  
20 and quantified by Qubit. A femto pulsefield was conducted to control for DNA small fragments. On  
21 a pulse field gel DNA appears above 2.2 Mbp to 225 kbp.

22

### 23 *Optical mapping library preparation*

24 In silico digestion with the previous genome (Ducrest et al., 2020) was used to find the best  
25 enzyme combination for the optical mapping. Direct labeling with the non-nicking enzyme DLE-1,

26 (5'-CTTAAG-3'recognition site) and the nicking enzyme Nt.BspQ1 (5'-GCTCCTTN1/N4-3') produced  
27 17.6 and 15.1 labels per 100 kbp of genomic DNA. 750 ng of genomic DNA were subjected to  
28 direct labeling and 300 ng of DNA to nick-label-repair-stain reactions following exactly the  
29 Bionano protocols (bionano Genomics, San Diego, USA) at the Functional Genomics Center of  
30 Zurich (University of Zurich, Switzerland). At the end the labeled DNA was quantified with Qubit  
31 and loaded into a nanochannel array of a Saphyr Chip (bionano Genomics) and run by  
32 electrophoresis each into a compartment of the Saphyr system.

33

#### 34 *Pacbio library preparation and Sequencing*

35 High molecular weight DNA was sheared with Megaruptor (Diagenode, Denville, NJ, USA) to obtain  
36 80kb fragments. After shearing the DNA size distribution was checked on a Fragment Analyzer  
37 (Advanced Analytical Technologies, Ames, IA, USA). A SMRTbell library was prepared with five µg  
38 of the DNA with the PacBio SMRTbell Express Template Prep Kit 2.0 (Pacific Biosciences, Menlo  
39 Park, CA, USA) according to the manufacturer's recommendations. The resulting library was size  
40 selected on a BluePippin system (Sage Science, Inc. Beverly, MA, USA) for molecules larger than  
41 35 kb that were sequenced on 12 SMRT cells 1M with v3.0/v3.0 chemistry and diffusion loading  
42 on a PacBio Sequel platform (Pacific Biosciences, Menlo Park, CA, USA) at 600 min movie length.

43

#### 44 *Assembly*

45 Sequencing produced 7.3 million long reads with a total sum length of unique single molecules of  
46 135 Gbp (N50 > 31Kb), an approximative 108X coverage for a 1.25Gb genome ( $135/1.25 =$   
47  $103.84$ ). Reads for the 12 SMRT cells have been deposited at DDBJ/ENA/GenBank under  
48 BioProject PRJNA694553. Reads were assembled using pb-assembly workflow from the PacBio  
49 Assembly Tool Suite (<https://github.com/PacificBiosciences/pb-assembly>) with default  
50 parameters. FALCON (Chin et al., 2016) was used to produce the primary assembly that yielded

51 10'814 contiguous primary contigs, a mixed of phased haplotypes and collapsed haplotype  
 52 regions. Haplotype reconstruction was performed using FALCON-Unzip v.3 (Chin et al., 2016)  
 53 resulting in 478 unzipped primary contigs partially phased, and 1736 fully phased haplotigs  
 54 which represented divergent haplotypes.

55 The resulting contigs were assembled into scaffolds using Bionano Solve v.3.4.1 (Bionano  
 56 Genomics, USA) with two optical mapping runs: DLE1 with nickase recognition site *cttaag* and  
 57 BspQ1 with nickase recognition site *gctcttc*. Each Bionano run was assembled into contigs using  
 58 the manufacturer's default pipeline and using the unzip contigs as hint for the rough assembly  
 59 auto-noise step of the pipeline (-r and -R parameters of pipelineCL.py). The 2 runs were then  
 60 combined with the unzip contigs to produce the finished scaffolded assembly using Bionano's  
 61 two-enzyme hybrid scaffold pipeline (runTGH.R) following the manufacturer's instructions. The  
 62 resulting assembly was composed of 70 scaffolds, considerably closer to the barn owl's karyotype  
 63 of 46 chromosomes than the previously available references. See Appendix 2 Table 1 for the full  
 64 assembly metrics.

65

66 **Appendix 2 Table 1** – Assembly metrics of the new barn owl reference genome, and comparison  
 67 to the previously available genome (Ducrest et al. 2020).

| Parameter              | New Genome    | Ducrest 2020  |
|------------------------|---------------|---------------|
| Length (bp)            | 1'249'867'532 | 1'219'191'878 |
| Nb scaffolds           | 70            | 21'509        |
| Longest scaffold (bp)  | 91'687'297    | 22'155'979    |
| Shortest scaffold (bp) | 43'623        | 500           |
| N50 (bp)               | 36'032'128    | 4'615'526     |
| L50                    | 13            | 72            |
| N90 (bp)               | 15'349'174    | 556'444       |
| L90                    | 33            | 350           |
| N's (bp)               | 51'362'034    | 9'580'001     |

68 **Appendix 2 Table 3** – BUSCO scores of the assembly

| Category                                   | N    | %    |
|--------------------------------------------|------|------|
| Complete BUSCOs (C)                        | 8079 | 96.9 |
| <i>Complete and single-copy BUSCOs (S)</i> | 8056 | 96.6 |
| <i>Complete and duplicated BUSCOs (D)</i>  | 23   | 0.3  |
| Fragmented BUSCOs (F)                      | 67   | 0.8  |
| Missing BUSCOs (M)                         | 192  | 2.3  |
| Total BUSCO groups searched                | 8338 | 100  |

69

70

71 *Identification of repeated sequences and coding regions*

72 RepeatModeler v.1.0.11 (Smit & Hubley, 2008-2015) and RepeatMasker v.4.0.7 (Smit, Hubley, &

73 Green, 2013-2015) were used to assess repeats and low complexity regions of the genome with

74 default parameters. RepeatModeler, a combination of three de-novo repeat finding programs

75 (RECON, RepeatScout and LtrHarvest/Ltr\_retriever) that produce a high-quality library of

76 transposable elements families, identified 122 families of repeated elements. Based on this

77 library, RepeatMasker was used to screen the reference genome, identifying 7.26% of the

78 assembly as interspersed repeats and 1.53% as low complexity DNA sequences (Appendix 2

79 Table 2).

80

81

82

83

84

85

86

87 **Appendix 2 Table 2** – Repetitive elements identified by RepeatMasker in the new reference  
 88 genome.

| Type of repetitive element | Nb of elements | Length (bp) | % of sequence |
|----------------------------|----------------|-------------|---------------|
| SINEs                      | 2745           | 401711      | 0.03          |
| <i>ALUs</i>                | 0              | 0           | 0             |
| <i>MIRs</i>                | 0              | 0           | 0             |
| LINEs                      | 72891          | 30575904    | 2.45          |
| <i>LINE1</i>               | 0              | 0           | 0             |
| <i>LINE2</i>               | 0              | 0           | 0             |
| <i>L3/CR1</i>              | 72891          | 30575904    | 2.45          |
| LTR elements               | 4518           | 5587338     | 0.45          |
| <i>ERVL</i>                | 1575           | 2102299     | 0.17          |
| <i>ERVL-MaLRs</i>          | 0              | 0           | 0             |
| <i>ERV_classI</i>          | 1702           | 1520708     | 0.12          |
| <i>ERV_classII</i>         | 777            | 882367      | 0.07          |
| DNA elements               | 0              | 0           | 0             |
| <i>hAT-Charlie</i>         | 0              | 0           | 0             |
| <i>TcMar-Tigger</i>        | 0              | 0           | 0             |
| Unclassified               | 81555          | 35130478    | 2.81          |
| Total interspersed repeats |                | 71695431    | 5.74          |
| Small RNA                  | 0              | 0           | 0             |
| Satellites                 | 1              | 224         | 0             |
| Simple repeats             | 377585         | 15568066    | 1.25          |
| Low complexity             | 65926          | 3543479     | 0.28          |

89

90 Red v.05.22.2015 (Girgis, 2015) was used to mark all repetitive regions in the genome through  
 91 machine learning, soft masking 36.6% of the assembly. Six previously published mRNAseq  
 92 libraries (Ducrest et al., 2020) were download from the European Bioinformatics Institute  
 93 European Nucleotide Archive (accession number ERP115928, from  
 94 doi.org/10.1002/ece3.5991). Reads were trimmed for adapter using Trimomatic v.0.36  
 95 (Bolger, Lohse, & Usadel, 2014), and then mapped to the masked reference using tophat2  
 96 v.2.1.1 (Kim et al., 2013) both with default settings. To identify coding regions, we applied the  
 97 Braker2 pipeline v.2.0.1 (Barnett, Garrison, Quinlan, Strömberg, & Marth, 2011; Bruna, Hoff,  
 98 Lomsadze, Stanke, & Borodovsky, 2020; Buchfink, Xie, & Huson, 2015; Gotoh, 2008; Hoff,

99 Lange, Lomsadze, Borodovsky, & Stanke, 2016; Hoff, Lomsadze, Borodovsky, & Stanke, 2019;  
100 Iwata & Gotoh, 2012; Li et al., 2009; Lomsadze, Burns, & Borodovsky, 2014; Lomsadze, Ter-  
101 Hovhannisyan, Chernoff, & Borodovsky, 2005; Stanke, Diekhans, Baertsch, & Haussler, 2008;  
102 Stanke, Schöffmann, Morgenstern, & Waack, 2006) on the soft masked version of the reference  
103 genome produced by Red. Braker2 is a combination of GeneMark-EP+ and AUGUSTUS, trained  
104 from RNA-Seq and/or protein homology information. We fed Braker2 with RNA-seq and protein  
105 data from OrthoDB v.101 restricted to proteins from Aves family (taxid 8782), yielding 19829  
106 coding regions (Appendix 2 Table 3).

107

108 **Appendix 2 Table 3** – BUSCO scores of identified coding regions.

| Category                                   | N    | %    |
|--------------------------------------------|------|------|
| Complete BUSCOs (C)                        | 7046 | 84.5 |
| <i>Complete and single-copy BUSCOs (S)</i> | 7013 | 84.1 |
| <i>Complete and duplicated BUSCOs (D)</i>  | 33   | 0.4  |
| Fragmented BUSCOs (F)                      | 677  | 8.1  |
| Missing BUSCOs (M)                         | 615  | 7.4  |
| Total BUSCO groups searched                | 8338 | 100  |

109

110

111

112

113

114

115

116

117

118

## 119 References

- 120 Barnett, D. W., Garrison, E. K., Quinlan, A. R., Strömberg, M. P., & Marth, G. T. (2011). BamTools:  
121 a C++ API and toolkit for analyzing and managing BAM files. *Bioinformatics*, 27(12), 1691–  
122 1692. doi: 10.1093/bioinformatics/btr174
- 123 Bolger, A. M., Lohse, M., & Usadel, B. (2014). Trimmomatic: A flexible trimmer for Illumina  
124 sequence data. *Bioinformatics*, 30(15), 2114–2120. doi: 10.1093/bioinformatics/btu170
- 125 Brůna, T., Hoff, K. J., Lomsadze, A., Stanke, M., & Borodovsky, M. (2020). BRAKER2: Automatic  
126 Eukaryotic Genome Annotation with GeneMark-EP+ and AUGUSTUS Supported by a Protein  
127 Database. *BioRxiv*, 2020.08.10.245134. doi: 10.1101/2020.08.10.245134
- 128 Buchfink, B., Xie, C., & Huson, D. H. (2015). Fast and sensitive protein alignment using DIAMOND.  
129 *Nature Methods*, 12(1), 59–60. doi: 10.1038/nmeth.3176
- 130 Chin, C. S., Peluso, P., Sedlazeck, F. J., Nattestad, M., Concepcion, G. T., Clum, A., ... Schatz, M. C.  
131 (2016). Phased diploid genome assembly with single-molecule real-time sequencing. *Nature*  
132 *Methods*, 13(12), 1050–1054. doi: 10.1038/nmeth.4035
- 133 Ducrest, A.-L., Neuenschwander, S., Schmid-Siegert, E., Pagni, M., Train, C., Dylus, D., ... Goudet, J.  
134 (2020). New genome assembly of the barn owl (*Tyto alba alba*). *Ecology and Evolution*,  
135 10(5), 2284–2298. doi: 10.1002/ece3.5991
- 136 Girgis, H. Z. (2015). Red: An intelligent, rapid, accurate tool for detecting repeats de-novo on the  
137 genomic scale. *BMC Bioinformatics*, 16(1), 227. doi: 10.1186/s12859-015-0654-5
- 138 Gotoh, O. (2008). A space-efficient and accurate method for mapping and aligning cDNA  
139 sequences onto genomic sequence. *Nucleic Acids Research*, 36(8), 2630–2638. doi:  
140 10.1093/nar/gkn105
- 141 Hoff, K. J., Lange, S., Lomsadze, A., Borodovsky, M., & Stanke, M. (2016). BRAKER1:  
142 Unsupervised RNA-Seq-Based Genome Annotation with GeneMark-ET and AUGUSTUS.  
143 *Bioinformatics*, 32(5), 767–769. doi: 10.1093/bioinformatics/btv661
- 144 Hoff, K. J., Lomsadze, A., Borodovsky, M., & Stanke, M. (2019). Whole-Genome Annotation with  
145 BRAKER. In M. Kollmar (Ed.), *Gene Prediction: Methods and Protocols* (pp. 65–95). New  
146 York, NY: Springer New York. doi: 10.1007/978-1-4939-9173-0\_5
- 147 Iwata, H., & Gotoh, O. (2012). Benchmarking spliced alignment programs including Spaln2, an  
148 extended version of Spaln that incorporates additional species-specific features. *Nucleic*  
149 *Acids Research*, 40(20), e161–e161. doi: 10.1093/nar/gks708
- 150 Kim, D., Pertea, G., Trapnell, C., Pimentel, H., Kelley, R., & Salzberg, S. L. (2013). TopHat2:  
151 Accurate alignment of transcriptomes in the presence of insertions, deletions and gene  
152 fusions. *Genome Biology*, 14(4), R36. doi: 10.1186/gb-2013-14-4-r36
- 153 Li, H., Handsaker, B., Wysoker, A., Fennell, T., Ruan, J., Homer, N., ... Durbin, R. (2009). The  
154 Sequence Alignment/Map format and SAMtools. *Bioinformatics*, 25(16), 2078–2079. doi:  
155 10.1093/bioinformatics/btp352
- 156 Lomsadze, A., Burns, P. D., & Borodovsky, M. (2014). Integration of mapped RNA-Seq reads into  
157 automatic training of eukaryotic gene finding algorithm. *Nucleic Acids Research*, 42(15),  
158 e119–e119. doi: 10.1093/nar/gku557
- 159 Lomsadze, A., Ter-Hovhannisyan, V., Chernoff, Y. O., & Borodovsky, M. (2005). Gene identification  
160 in novel eukaryotic genomes by self-training algorithm. *Nucleic Acids Research*, 33(20),  
161 6494–6506. doi: 10.1093/nar/gki937

- 162 Smit, A. F., & Hubley, R. (2013-2015). RepeatModeler Open-1.0. Retrieved from  
163 <http://www.repeatmasker.org>
- 164 Smit, A. F., Hubley, R., & Green, P. (2008-2015). RepeatMasker Open-4.0. Retrieved from  
165 <http://www.repeatmasker.org>
- 166 Stanke, M., Diekhans, M., Baertsch, R., & Haussler, D. (2008). Using native and syntenically  
167 mapped cDNA alignments to improve de novo gene finding. *Bioinformatics (Oxford,  
168 England)*, 24(5), 637–644. doi: 10.1093/bioinformatics/btn013
- 169 Stanke, M., Schöffmann, O., Morgenstern, B., & Waack, S. (2006). Gene prediction in eukaryotes  
170 with a generalized hidden Markov model that uses hints from external sources. *BMC  
171 Bioinformatics*, 7(1), 62. doi: 10.1186/1471-2105-7-62
- 172 Zhang, M., Zhang, Y., Scheuring, C. F., Wu, C.-C., Dong, J. J., & Zhang, H.-B. (2012). Preparation of  
173 megabase-sized DNA from a variety of organisms using the nuclei method for advanced  
174 genomics research. *Nature Protocols*, 7(3), 467–478. doi: 10.1038/nprot.2011.455
- 175
